# Supplementary material for: Genome-Wide Association Study and Selection Signatures Detect Genomic Regions Associated with Seed Yield and Oil Quality in Flax
Source: Preprints.org preprint supplement (doi:10.20944/preprints201807.0397.v2), 2018-08-03
Supplement: Supplementary file 1 [file supplementary]

Genome-wide association study and selection signatures detect genomic regions associated with seed yield and oil quality in flax

Frank M. You 1,2,*, Jin Xiao 1,3, Pingchuan Li 1, Zhen Yao 2, Gaofeng Jia 1,4, Liqiang He 1, Santosh Kumar 5, Braulio Soto-Cerda 6,7, Scott D. Duguid 2, Helen M. Booker 4, Khalid Y. Rashid 2, and Sylvie Cloutier 1,6,*

1 Ottawa Research and Development Centre, Agriculture and Agri-Food Canada, Ottawa, ON, K1A 0C6, Canada; frank.you@agr.gc.ca; sylvie.cloutuer@agr.gc.ca

2 Morden Research and Development Centre, Agriculture and Agri-Food Canada, Morden, MB, R6M 1Y5, Canada; lipingchuan@gmail.com; zhen.yao@canada.ca; liqiang.he@canada.ca; scott.duguid@agr.gc.ca; khalid.rashid@agr.gc.ca

3 Department of Agronomy, Nanjing Agricultural University, Nanjing 210095; xiaojin@njau.edu.cn

4 Crop Development Centre, University of Saskatchewan, Saskatoon, SK, S7N 5A8, Canada; gaofeng.jia@usask.ca; helen.booker@usask.ca

5 Brandon Research and Development Centre, Agriculture and Agri-Food Canada, Brandon, MB, R7A 5Y3, Canada; Santosh.kumar@agr.gc.ca

6 Department of Plant Science, University of Manitoba, Winnipeg, MB, R3T 2N2, Canada

7 Agriaquaculture Nutritional Genomic Center, CGNA, Temuco, 4871158; braulio.soto@cgna.cl

***** Correspondence: frank.you@agr.gc.ca Tel.: +01-613-759-1539; sylvie.cloutuer@agr.gc.ca Tel.: +01-613-759-1744

**Figure S1.** Manhattan and quantile-quantile (Q-Q) plots of 10 traits using BLUP values of traits estimated from six or eight environments in the BM+EV+SU population using GLM. PLH: plant height; DTM: days to maturity; PRO: protein content (%); OIL: oil content (%); IOD: iodine value; PAL: palmitic acid content (%); STE: stearic acid content (%); OLE: oleic acid content (%); LIO: linoleic acid content (%); LIN: linolenic acid content (%).


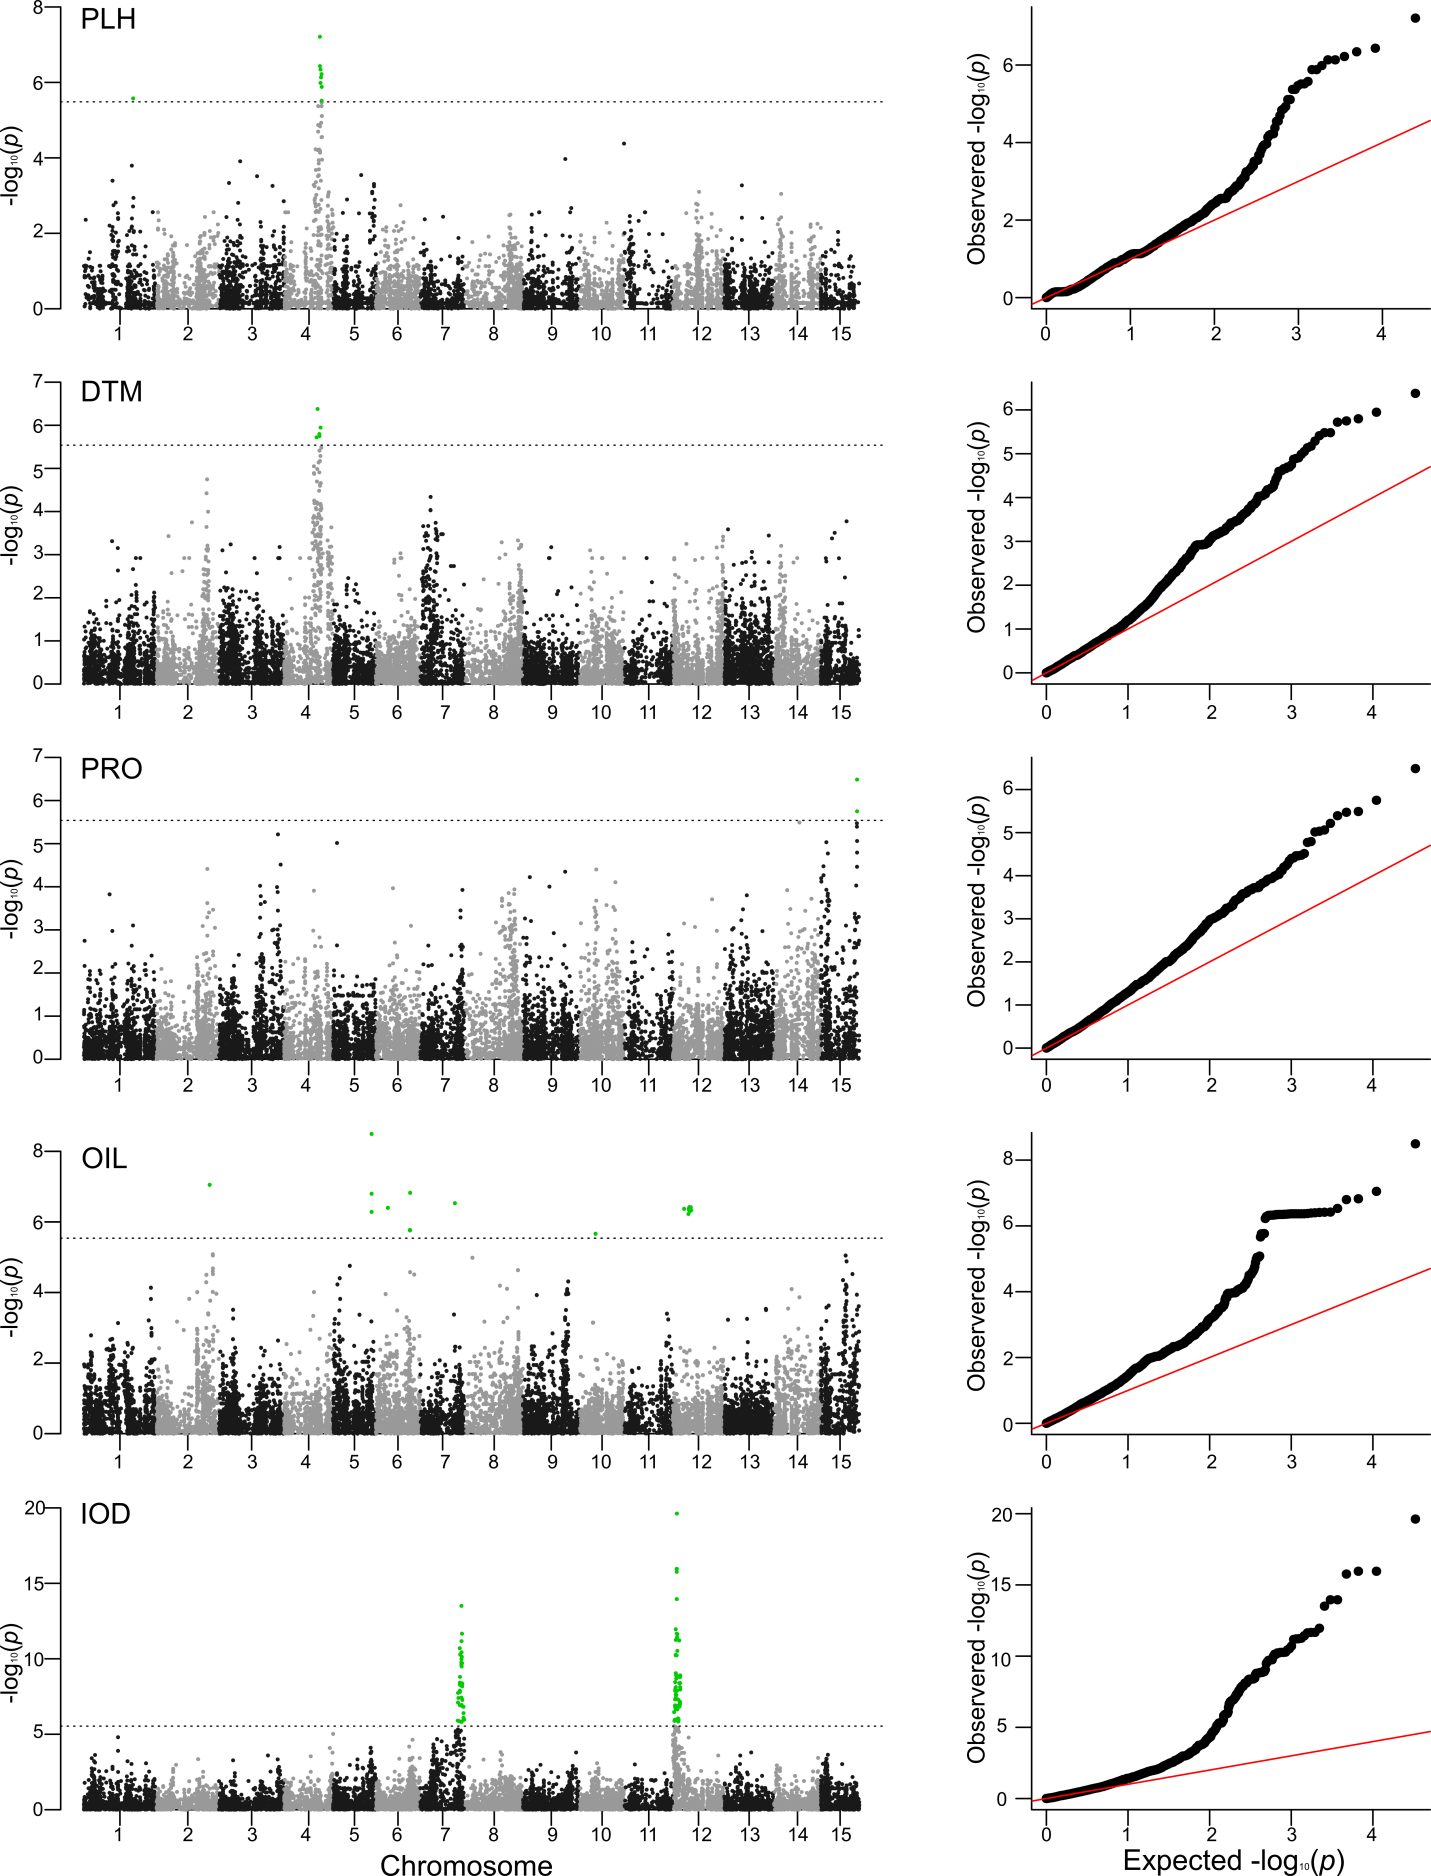


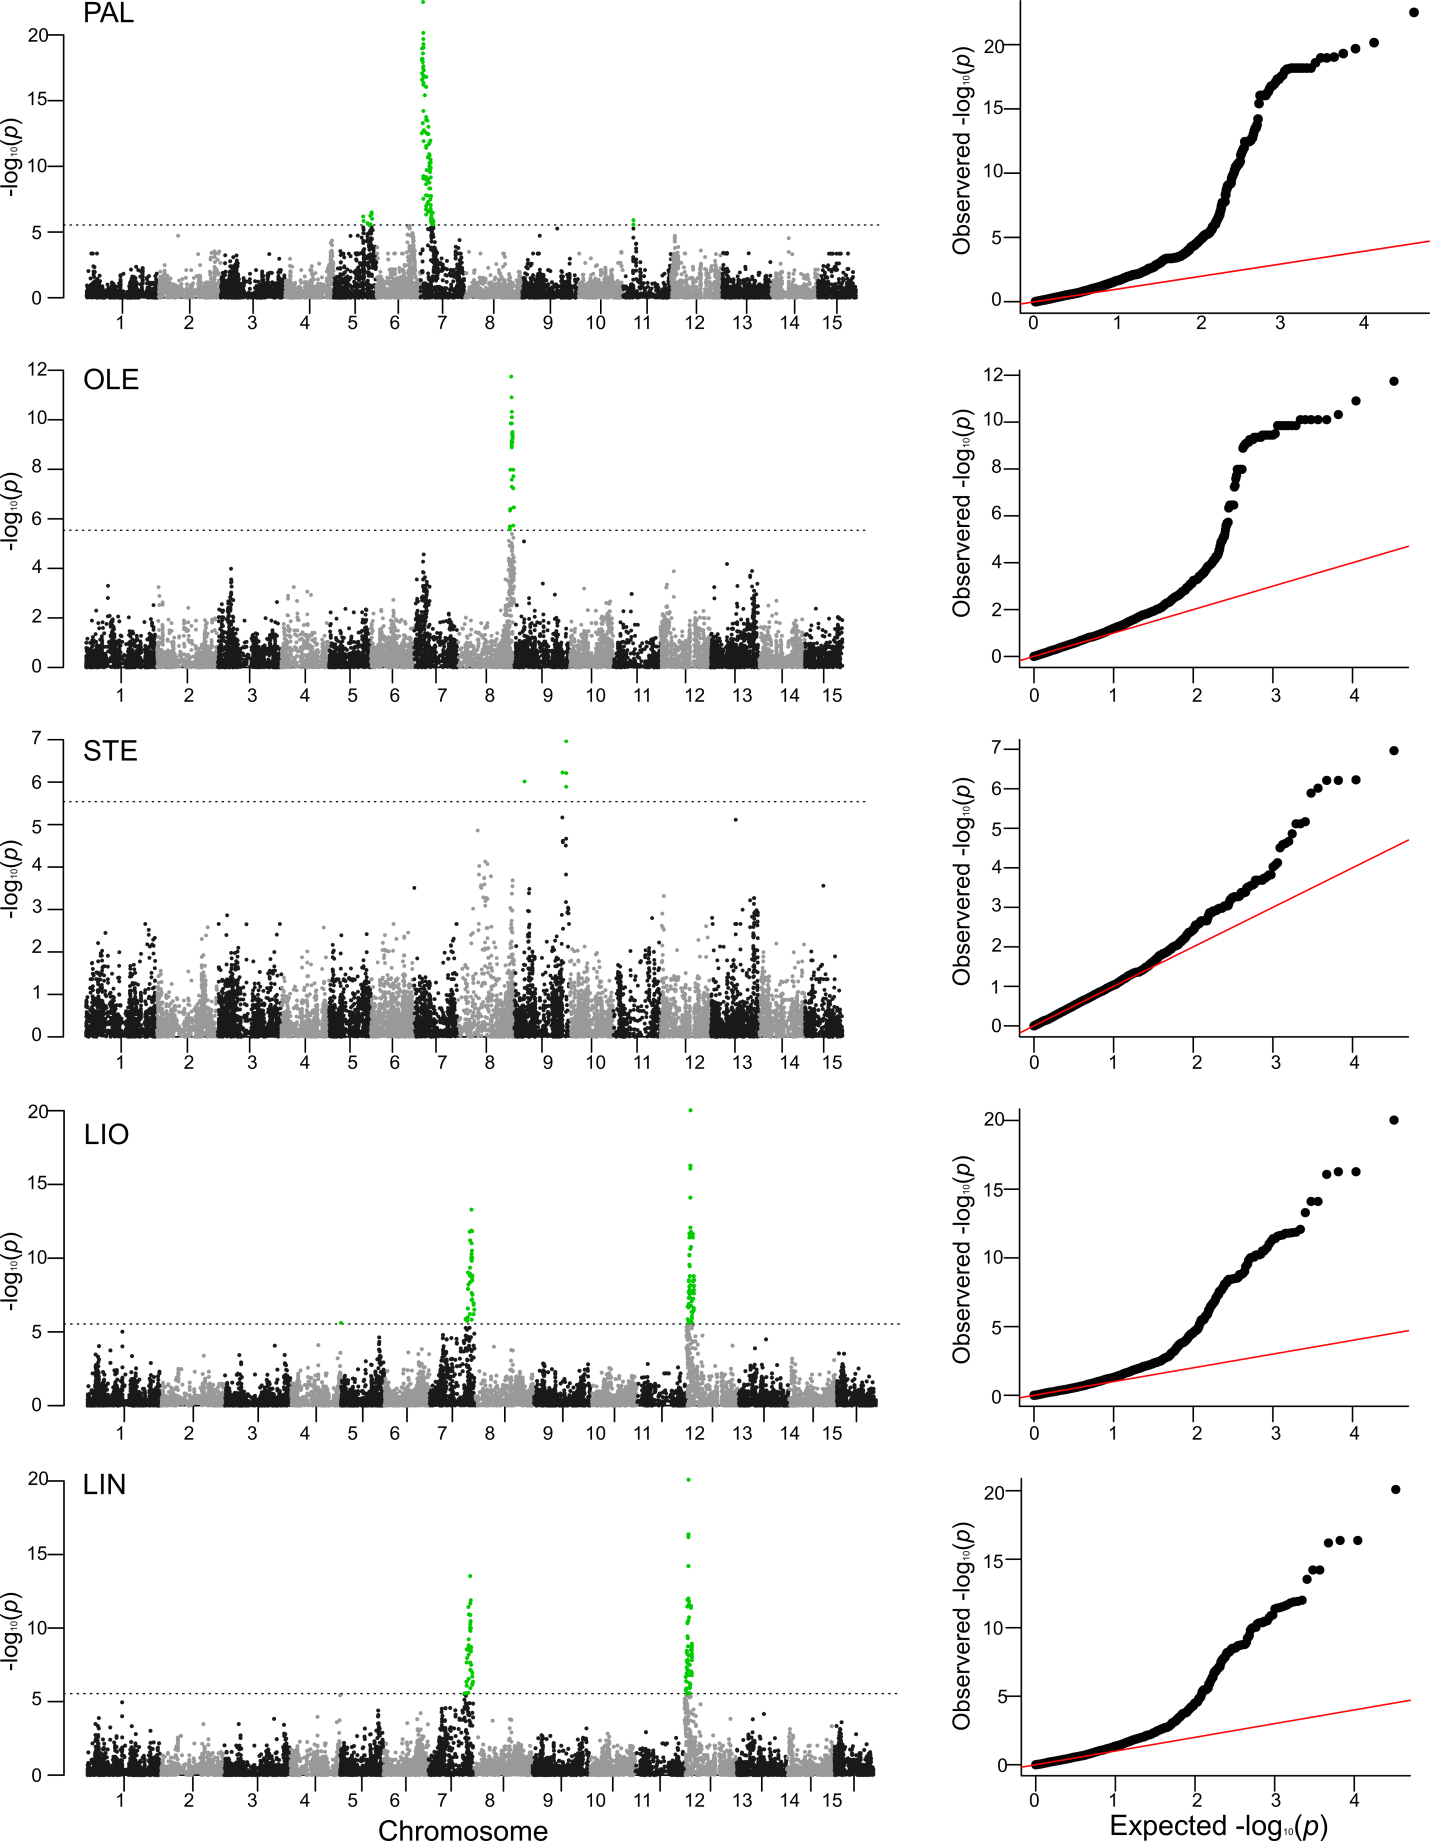


**Figure S2.** Manhattan and quantile-quantile (Q-Q) plots of seed yield (YLD) using the BM+EV+SU combined population and GLM in two environments: (a) Morden 2010 and (b) Saskatoon 2012 showing the same QTL on chromosome 4.


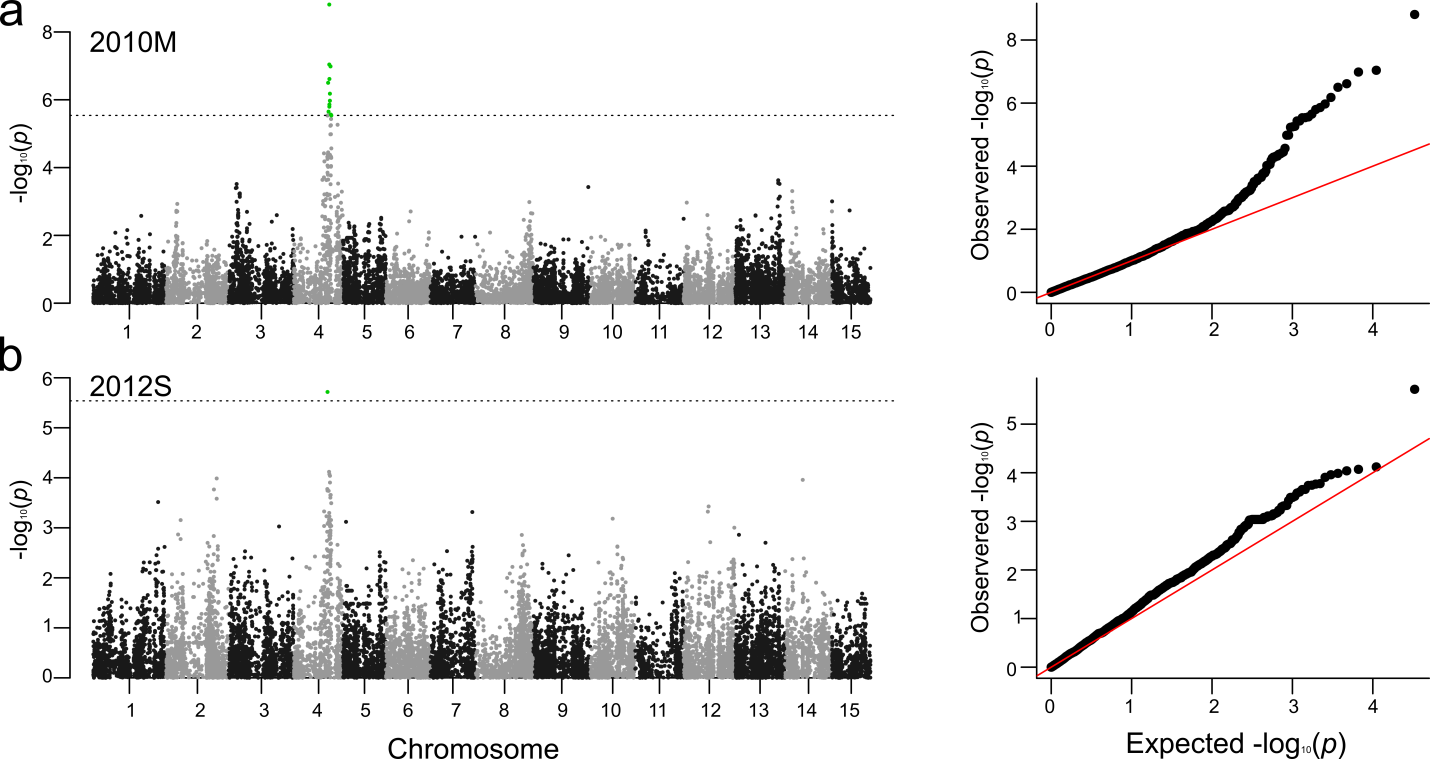


**Figure S3.** Histograms of 11 seed yield related and seed quality traits. A normal curve is fitted for each histogram.

**
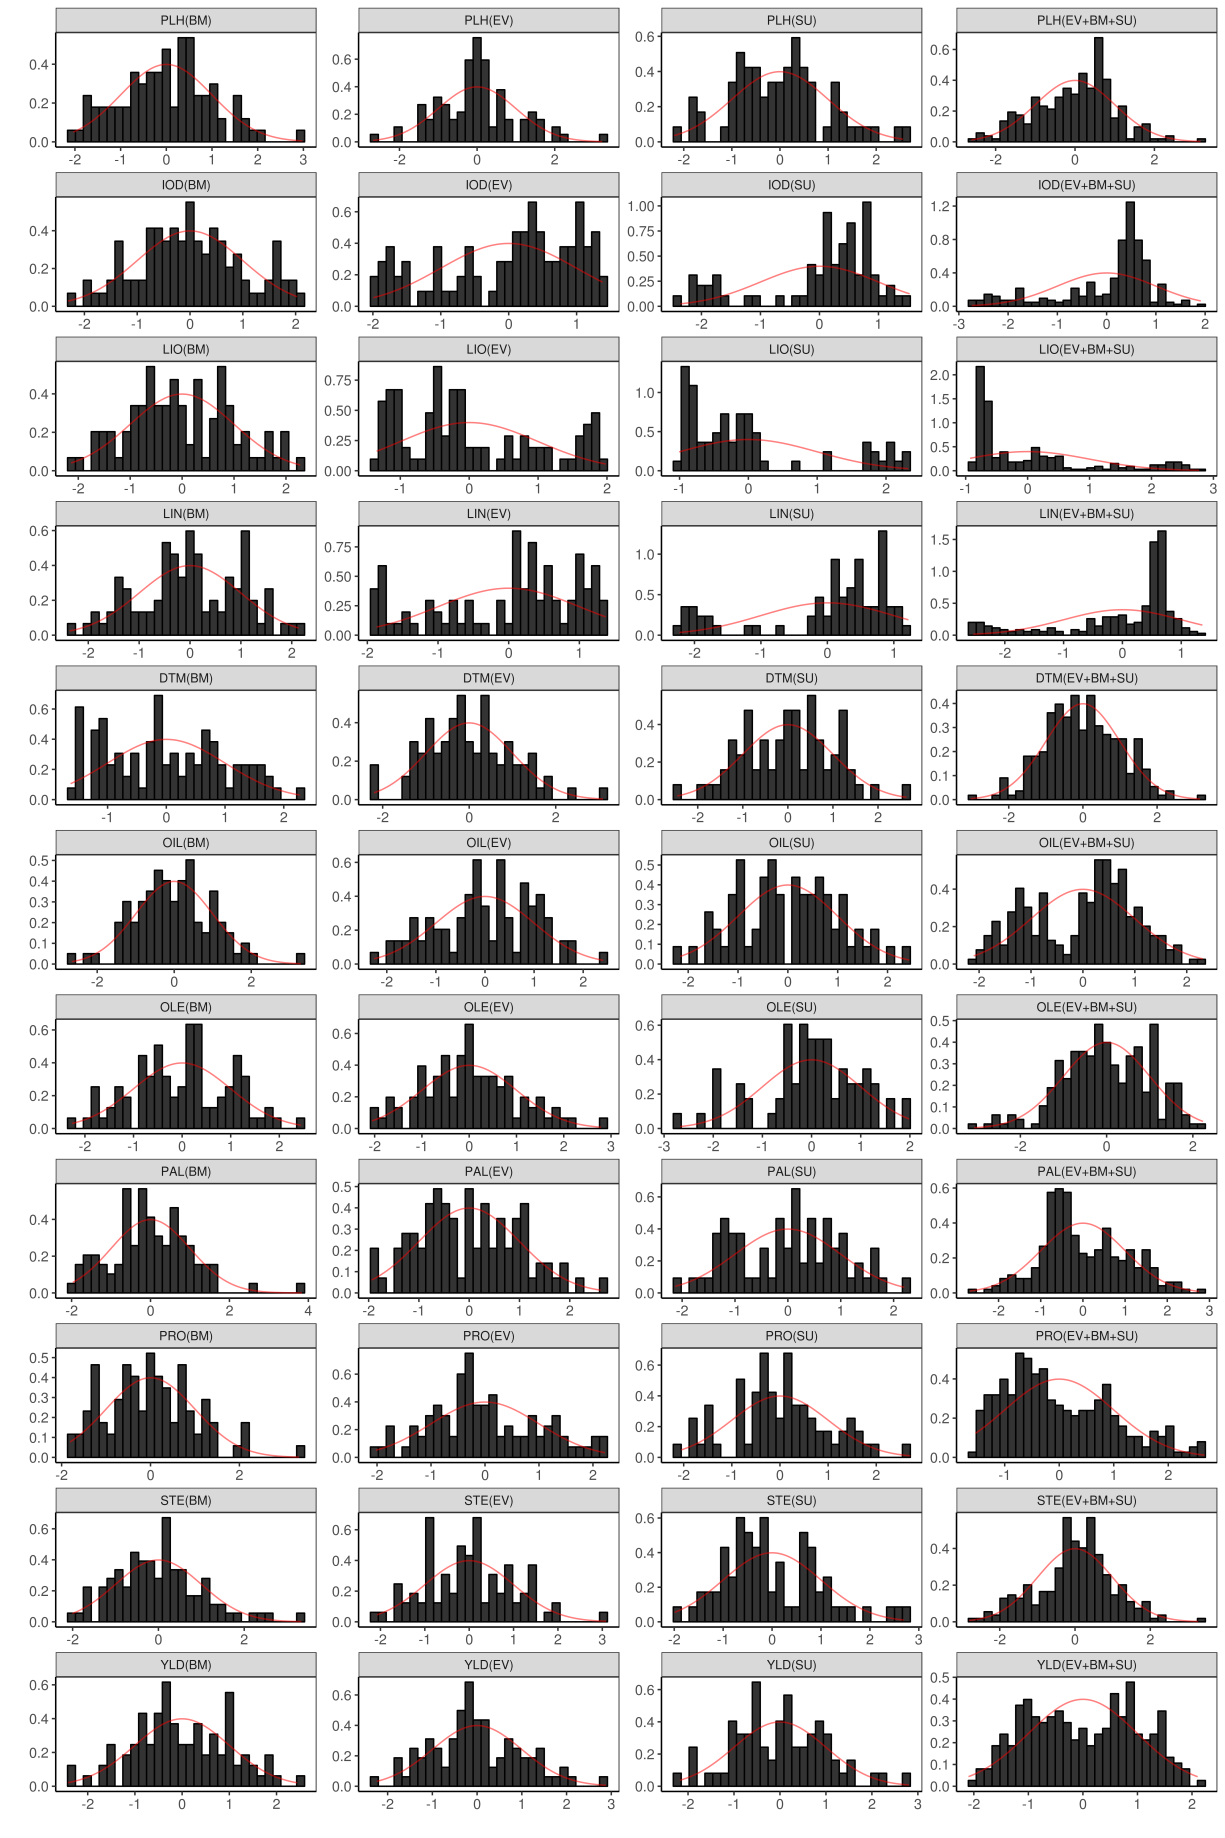
**
