# Supplementary material for: Genome-Wide Association Study and Selection Signatures Detect Genomic Regions Associated with Seed Yield and Oil Quality in Flax
Source: Preprints.org preprint supplement (doi:10.20944/preprints201807.0397.v2), 2018-08-03
Supplement: Supplementary file 4 [file Table_S10.xlsx]

## Sheet: Sheet1
Table S10. Selective signatures identified from BM vs. EV
Selective sweep	Chromosome	Start	End	Size (kb)	XP-CLR score	Total SNPs
1	1	240001	250000	10	10.4826	38
2	1	1630001	2460000	830	8.80994	142
3	1	2820001	3250000	430	41.3849	419
4	1	3630001	3640000	10	14.1168	55
5	1	4250001	5000000	750	14.6653	190
6	1	5720001	6820000	1100	15.2226	261
7	1	11030001	11580000	550	41.6357	229
8	1	15960001	15970000	10	7.92107	11
9	1	16440001	16890000	450	14.9643	308
10	1	17050001	17860000	810	15.0898	185
11	1	18550001	18570000	20	15.2446	174
12	1	27540001	27550000	10	10.7551	50
13	1	28690001	29000000	310	12.5199	68
14	2	19240001	19870000	630	23.7065	670
15	2	21280001	21290000	10	50.1461	40
16	2	22740001	22760000	20	11.3701	114
17	2	23070001	23340000	270	22.2128	251
18	2	24410001	24760000	350	13.0797	94
19	3	1610001	1620000	10	10.576	11
20	3	4370001	4380000	10	24.617	69
21	3	4760001	5610000	850	44.9852	165
22	3	7150001	7410000	260	26.289	66
23	3	8250001	8260000	10	38.6191	11
24	3	9510001	9520000	10	21.8357	46
25	3	10660001	10670000	10	13.3163	22
26	3	11970001	11980000	10	9.49999	44
27	3	17000001	17560000	560	32.4528	133
28	3	21830001	22300000	470	27.5142	69
29	4	480001	900000	420	21.3631	81
30	4	13830001	13840000	10	9.66027	174
31	4	14600001	14610000	10	12.5419	33
32	4	17950001	17970000	20	15.2851	38
33	4	18070001	18550000	480	16.011	143
34	4	19460001	19750000	290	13.1264	85
35	5	2540001	2890000	350	37.2925	282
36	5	4440001	4750000	310	15.9126	136
37	5	4860001	4920000	60	16.555	290
38	5	5640001	5650000	10	8.02056	44
39	5	11930001	11940000	10	9.39793	41
40	5	13930001	14270000	340	12.1446	70
41	5	16720001	17000000	280	8.02967	94
42	5	17240001	17250000	10	9.04385	76
43	6	490001	500000	10	22.2736	10
44	6	13420001	13440000	20	8.32164	152
45	6	13810001	14130000	320	50.5779	315
46	6	14720001	14730000	10	49.512	10
47	6	15330001	15490000	160	28.0779	262
48	6	17650001	17660000	10	12.7646	33
49	7	3800001	3810000	10	14.5944	19
50	7	4800001	5140000	340	17.7442	143
51	7	13890001	13900000	10	8.21596	22
52	7	14510001	14520000	10	16.4334	63
53	7	15000001	15010000	10	8.47719	11
54	7	15690001	16260000	570	18.751	957
55	7	16440001	17690000	1250	45.7003	1425
56	7	17920001	18240000	320	10.3494	272
57	8	11000001	11010000	10	9.40863	10
58	8	12660001	12670000	10	8.32089	18
59	8	17320001	17330000	10	11.1116	24
60	8	19290001	19320000	30	11.1318	74
61	8	19900001	19920000	20	8.9909	11
62	8	21750001	21770000	20	25.3213	152
63	8	22550001	22600000	50	12.6437	84
64	9	760001	770000	10	14.699	46
65	9	2770001	3580000	810	10.8557	206
66	9	3970001	3980000	10	13.44	55
67	9	5760001	6310000	550	14.4368	203
68	9	16630001	16640000	10	24.5437	71
69	9	17180001	18180000	1000	14.2889	377
70	9	18940001	18950000	10	26.5638	10
71	9	19350001	19430000	80	22.1066	86
72	9	20220001	20400000	180	27.5494	21
73	10	740001	750000	10	8.28304	12
74	10	7210001	7220000	10	8.52036	65
75	10	9580001	9590000	10	12.425	11
76	10	12500001	12520000	20	9.42422	11
77	10	16300001	16310000	10	12.432	66
78	10	16660001	16810000	150	22.5695	52
79	10	17360001	17830000	470	9.91819	55
80	11	2050001	2060000	10	9.49746	72
81	11	2570001	2580000	10	13.4501	71
82	11	3080001	3130000	50	34.2234	86
83	11	16940001	17080000	140	15.7615	295
84	11	18760001	19260000	500	44.747	49
85	12	1170001	1190000	20	8.60022	399
86	12	2480001	2970000	490	106.222	555
87	12	3600001	4340000	740	18.9209	116
88	12	6860001	6930000	70	27.7737	33
89	12	10120001	10130000	10	22.133	11
90	12	10860001	10870000	10	12.5102	10
91	12	11820001	11830000	10	11.8451	11
92	12	18010001	18020000	10	14.351	33
93	12	19660001	19690000	30	37.4986	73
94	12	20240001	20470000	230	16.6549	246
95	13	1150001	1350000	200	26.8955	137
96	13	2100001	2230000	130	19.8671	33
97	13	3900001	3950000	50	12.7997	58
98	13	9060001	9070000	10	21.7784	22
99	13	9310001	10700000	1390	34.8806	146
100	13	13800001	13820000	20	33.0593	52
101	13	14930001	14960000	30	7.9255	55
102	13	16890001	16900000	10	8.60052	70
103	13	18020001	18030000	10	32.4945	11
104	14	950001	1250000	300	38.0075	166
105	14	1930001	2460000	530	40.6151	716
106	14	13700001	14110000	410	42.1135	310
107	14	14270001	14690000	420	26.8666	134
108	15	1660001	1670000	10	9.10611	63
109	15	2310001	2840000	530	19.8848	345
110	15	3170001	3270000	100	20.9087	115
111	15	11920001	11940000	20	16.5555	66
112	15	12550001	12560000	10	8.4213	11
113	15	13660001	14760000	1100	8.50085	578
114	15	15300001	15580000	280	8.88587	81
