# Supplementary material for: Genome-Wide Association Study and Selection Signatures Detect Genomic Regions Associated with Seed Yield and Oil Quality in Flax
Source: Preprints.org preprint supplement (doi:10.20944/preprints201807.0397.v2), 2018-08-03
Supplement: Supplementary file 5 [file Table_S11.xls]

## Sheet: Sheet1
BM vs EV	1	1630001	2460000	830	8.80994	142	2	1	QSte.BM.crc-LG1	m-1	STE	2401960	2602160	Lu1_2670961	Kumar et al., 2015
BM vs EV	3	4760001	5610000	850	44.9852	165	21	3	QLio.BM.crc-LG3	m-2	LIO	4699827	4900027	Lu3_5950394	Kumar et al., 2015
BM vs EV	3	4760001	5610000	850	44.9852	165	21	3	QOle.BM.crc-LG3-1	m-2	OLE	4699827	4900027	Lu3_5950394	Kumar et al., 2015
BM vs EV	3	7150001	7410000	260	26.289	66	22	3	QSte.BM.crc-LG3	m-3	STE	7163317	7363517	Lu3_8415336	Kumar et al., 2015
BM vs EV	4	13830001	13840000	10	9.66027	174	30	4	QDm.BM.crc-LG4	m-5	DTM	13171757	15042104	-	Kumar et al., 2015
BM vs EV	4	13830001	13840000	10	9.66027	174	30	4	QDTM-Lu4.1	7	DTM	13171757	15042104	-	-
BM vs EV	4	13830001	13840000	10	9.66027	174	30	4	QYld.BM.crc-LG4	m-4	YLD	13594936	14968389	-	Kumar et al., 2015
BM vs EV	4	13830001	13840000	10	9.66027	174	30	4	QYld.BM.crc-LG4	m-5	YLD	13594936	14968389	-	Kumar et al., 2015
BM vs EV	4	13830001	13840000	10	9.66027	174	30	4	QYLD-Lu4.1	1	YLD	13594936	14968389	-	-
BM vs EV	4	13830001	13840000	10	9.66027	174	30	4	QYLD-Lu4.1	1	YLD	13594936	14968389		-
BM vs EV	4	14600001	14610000	10	12.5419	33	31	4	QDm.BM.crc-LG4	m-5	DTM	13171757	15042104	-	Kumar et al., 2015
BM vs EV	4	14600001	14610000	10	12.5419	33	31	4	QDTM-Lu4.1	7	DTM	13171757	15042104	-	-
BM vs EV	4	14600001	14610000	10	12.5419	33	31	4	QYld.BM.crc-LG4	m-4	YLD	13594936	14968389	-	Kumar et al., 2015
BM vs EV	4	14600001	14610000	10	12.5419	33	31	4	QYld.BM.crc-LG4	m-5	YLD	13594936	14968389	-	Kumar et al., 2015
BM vs EV	4	14600001	14610000	10	12.5419	33	31	4	QYLD-Lu4.1	1	YLD	13594936	14968389	-	-
BM vs EV	4	14600001	14610000	10	12.5419	33	31	4	QYLD-Lu4.1	1	YLD	13594936	14968389		-
BM vs EV	4	14600001	14610000	10	12.5419	33	31	4	QPLH-Lu4.3	4	PLH	14305982	15042104	-	-
BM vs EV	5	13930001	14270000	340	12.1446	70	40	5	QPAL-Lu5.2	22	PAL	13797851	15668995	-	-
BM vs EV	6	13810001	14130000	320	50.5779	315	45	6	QOIL-Lu6.4	13	OIL	13799180	13970951	-	-
BM vs EV	7	3800001	3810000	10	14.5944	19	49	7	QPal.BM.crc-LG7;QPAL.crc-LG9;c79-s540_Lu2534	m-6	PAL	624461	5423691	-	Kumar et al.,2015;Cloutier et al.,2011;Soto-Cerda et al.,2014
BM vs EV	7	3800001	3810000	10	14.5944	19	49	7	QPAL-Lu7.3	23	PAL	624461	5423691	-	-
BM vs EV	7	4800001	5140000	340	17.7442	143	50	7	QPal.BM.crc-LG7;QPAL.crc-LG9;c79-s540_Lu2534	m-6	PAL	624461	5423691	-	Kumar et al.,2015;Cloutier et al.,2011;Soto-Cerda et al.,2014
BM vs EV	7	4800001	5140000	340	17.7442	143	50	7	QPAL-Lu7.3	23	PAL	624461	5423691	-	-
BM vs EV	7	15690001	16260000	570	18.751	957	54	7	QIOD.crc-LG7;QLIO.crc-LG7;c281-s185_ Lu566	m-7	IOD	15346458	17977459	-	Cloutier et al.,2011;Soto-Cerda et al.,2014
BM vs EV	7	15690001	16260000	570	18.751	957	54	7	QIOD-Lu7.2	19	IOD	15346458	17977459	-	-
BM vs EV	7	15690001	16260000	570	18.751	957	54	7	QIOD.crc-LG7;QLIO.crc-LG7;c281-s185_ Lu566	m-7	LIN	15425129	17977459	-	Cloutier et al.,2011;Soto-Cerda et al.,2014
BM vs EV	7	15690001	16260000	570	18.751	957	54	7	QIOD.crc-LG7;QLIO.crc-LG7;c281-s185_ Lu566	m-7	LIO	15425129	17977459	-	Cloutier et al.,2011;Soto-Cerda et al.,2014
BM vs EV	7	15690001	16260000	570	18.751	957	54	7	QLIN-Lu7.2	32	LIN	15425129	17977459	-	-
BM vs EV	7	15690001	16260000	570	18.751	957	54	7	QLIO-Lu7.2	29	LIO	15425129	17977459	-	-
BM vs EV	7	16440001	17690000	1250	45.7003	1425	55	7	QIOD.crc-LG7;QLIO.crc-LG7;c281-s185_ Lu566	m-7	IOD	15346458	17977459	-	Cloutier et al.,2011;Soto-Cerda et al.,2014
BM vs EV	7	16440001	17690000	1250	45.7003	1425	55	7	QIOD-Lu7.2	19	IOD	15346458	17977459	-	-
BM vs EV	7	16440001	17690000	1250	45.7003	1425	55	7	QIOD.crc-LG7;QLIO.crc-LG7;c281-s185_ Lu566	m-7	LIN	15425129	17977459	-	Cloutier et al.,2011;Soto-Cerda et al.,2014
BM vs EV	7	16440001	17690000	1250	45.7003	1425	55	7	QIOD.crc-LG7;QLIO.crc-LG7;c281-s185_ Lu566	m-7	LIO	15425129	17977459	-	Cloutier et al.,2011;Soto-Cerda et al.,2014
BM vs EV	7	16440001	17690000	1250	45.7003	1425	55	7	QLIN-Lu7.2	32	LIN	15425129	17977459	-	-
BM vs EV	7	16440001	17690000	1250	45.7003	1425	55	7	QLIO-Lu7.2	29	LIO	15425129	17977459	-	-
BM vs EV	7	17920001	18240000	320	10.3494	272	56	7	QIOD.crc-LG7;QLIO.crc-LG7;c281-s185_ Lu566	m-7	IOD	15346458	17977459	-	Cloutier et al.,2011;Soto-Cerda et al.,2014
BM vs EV	7	17920001	18240000	320	10.3494	272	56	7	QIOD-Lu7.2	19	IOD	15346458	17977459	-	-
BM vs EV	7	17920001	18240000	320	10.3494	272	56	7	QIOD.crc-LG7;QLIO.crc-LG7;c281-s185_ Lu566	m-7	LIN	15425129	17977459	-	Cloutier et al.,2011;Soto-Cerda et al.,2014
BM vs EV	7	17920001	18240000	320	10.3494	272	56	7	QIOD.crc-LG7;QLIO.crc-LG7;c281-s185_ Lu566	m-7	LIO	15425129	17977459	-	Cloutier et al.,2011;Soto-Cerda et al.,2014
BM vs EV	7	17920001	18240000	320	10.3494	272	56	7	QLIN-Lu7.2	32	LIN	15425129	17977459	-	-
BM vs EV	7	17920001	18240000	320	10.3494	272	56	7	QLIO-Lu7.2	29	LIO	15425129	17977459	-	-
BM vs EV	8	22550001	22600000	50	12.6437	84	63	8	QOLE-Lu8.1	25	OLE	21782841	23527563	-	-
BM vs EV	9	20220001	20400000	180	27.5494	21	72	9	QSTE-Lu9.2	27	STE	20080531	21636823	-	-
BM vs EV	10	16660001	16810000	150	22.5695	52	78	10	unamed2	m-8	OIL	16715891	16916072	Lu2262	Soto-Cerda et al.,2014
BM vs EV	10	17360001	17830000	470	9.91819	55	79	10	unamed19	m-9	LIN	17374013	17574397	Lu2746	Soto-Cerda et al.,2014
BM vs EV	10	17360001	17830000	470	9.91819	55	79	10	unamed25	m-9	IOD	17374013	17574397	Lu2746	Soto-Cerda et al.,2014
BM vs EV	12	1170001	1190000	20	8.60022	399	85	12	QIOD.crc-LG16;QLIO.crc-LG16;Llio-LG12.3	m-10	IOD	489561	2981642	-	Cloutier et al.,2011;Soto-Cerda et al.,2014
BM vs EV	12	1170001	1190000	20	8.60022	399	85	12	QIOD.crc-LG16;QLIO.crc-LG16;Llio-LG12.3	m-10	LIN	489561	2981642	-	Cloutier et al.,2011;Soto-Cerda et al.,2014
BM vs EV	12	1170001	1190000	20	8.60022	399	85	12	QIOD.crc-LG16;QLIO.crc-LG16;Llio-LG12.3	m-10	LIO	489561	2981642	-	Cloutier et al.,2011;Soto-Cerda et al.,2014
BM vs EV	12	1170001	1190000	20	8.60022	399	85	12	QIOD-Lu12.3	20	IOD	489561	2981642	-	-
BM vs EV	12	1170001	1190000	20	8.60022	399	85	12	QLIN-Lu12.3	33	LIN	489561	2981642	-	-
BM vs EV	12	1170001	1190000	20	8.60022	399	85	12	QLIO-Lu12.3	30	LIO	489561	2981642	-	-
BM vs EV	12	2480001	2970000	490	106.222	555	86	12	QIOD.crc-LG16;QLIO.crc-LG16;Llio-LG12.3	m-10	IOD	489561	2981642	-	Cloutier et al.,2011;Soto-Cerda et al.,2014
BM vs EV	12	2480001	2970000	490	106.222	555	86	12	QIOD.crc-LG16;QLIO.crc-LG16;Llio-LG12.3	m-10	LIN	489561	2981642	-	Cloutier et al.,2011;Soto-Cerda et al.,2014
BM vs EV	12	2480001	2970000	490	106.222	555	86	12	QIOD.crc-LG16;QLIO.crc-LG16;Llio-LG12.3	m-10	LIO	489561	2981642	-	Cloutier et al.,2011;Soto-Cerda et al.,2014
BM vs EV	12	2480001	2970000	490	106.222	555	86	12	QIOD-Lu12.3	20	IOD	489561	2981642	-	-
BM vs EV	12	2480001	2970000	490	106.222	555	86	12	QLIN-Lu12.3	33	LIN	489561	2981642	-	-
BM vs EV	12	2480001	2970000	490	106.222	555	86	12	QLIO-Lu12.3	30	LIO	489561	2981642	-	-
BM vs EV	12	6860001	6930000	70	27.7737	33	88	12	QOIL-Lu12.6	16	OIL	4591214	7491405	-	-
BM vs EV	15	13660001	14760000	1100	8.50085	578	113	15	QOIL-Lu15.7	17	OIL	14665900	15429055	-	-
BM vs EV	15	13660001	14760000	1100	8.50085	578	113	15	QPRO-Lu15.1	9	PRO	14746288	14746310	-	-
BM vs EV	15	15300001	15580000	280	8.88587	81	114	15	QOIL-Lu15.7	17	OIL	14665900	15429055	-	-
BM vs EV	1	240001	250000	10	10.4826	38	1					1
BM vs EV	1	2820001	3250000	430	41.3849	419	3					1
BM vs EV	1	3630001	3640000	10	14.1168	55	4					1
BM vs EV	1	4250001	5000000	750	14.6653	190	5					1
BM vs EV	1	5720001	6820000	1100	15.2226	261	6					1
BM vs EV	1	11030001	11580000	550	41.6357	229	7					1
BM vs EV	1	15960001	15970000	10	7.92107	11	8					1
BM vs EV	1	16440001	16890000	450	14.9643	308	9					1
BM vs EV	1	17050001	17860000	810	15.0898	185	10					1
BM vs EV	1	18550001	18570000	20	15.2446	174	11					1
BM vs EV	1	27540001	27550000	10	10.7551	50	12					1
BM vs EV	1	28690001	29000000	310	12.5199	68	13					1
BM vs EV	2	19240001	19870000	630	23.7065	670	14					1
BM vs EV	2	21280001	21290000	10	50.1461	40	15					1
BM vs EV	2	22740001	22760000	20	11.3701	114	16					1
BM vs EV	2	23070001	23340000	270	22.2128	251	17					1
BM vs EV	2	24410001	24760000	350	13.0797	94	18					1
BM vs EV	3	1610001	1620000	10	10.576	11	19					1
BM vs EV	3	4370001	4380000	10	24.617	69	20					1
BM vs EV	3	8250001	8260000	10	38.6191	11	23					1
BM vs EV	3	9510001	9520000	10	21.8357	46	24					1
BM vs EV	3	10660001	10670000	10	13.3163	22	25					1
BM vs EV	3	11970001	11980000	10	9.49999	44	26					1
BM vs EV	3	17000001	17560000	560	32.4528	133	27					1
BM vs EV	3	21830001	22300000	470	27.5142	69	28					1
BM vs EV	4	480001	900000	420	21.3631	81	29					1
BM vs EV	4	17950001	17970000	20	15.2851	38	32					1
BM vs EV	4	18070001	18550000	480	16.011	143	33					1
BM vs EV	4	19460001	19750000	290	13.1264	85	34					1
BM vs EV	5	2540001	2890000	350	37.2925	282	35					1
BM vs EV	5	4440001	4750000	310	15.9126	136	36					1
BM vs EV	5	4860001	4920000	60	16.555	290	37					1
BM vs EV	5	5640001	5650000	10	8.02056	44	38					1
BM vs EV	5	11930001	11940000	10	9.39793	41	39					1
BM vs EV	5	16720001	17000000	280	8.02967	94	41					1
BM vs EV	5	17240001	17250000	10	9.04385	76	42					1
BM vs EV	6	490001	500000	10	22.2736	10	43					1
BM vs EV	6	13420001	13440000	20	8.32164	152	44					1
BM vs EV	6	14720001	14730000	10	49.512	10	46					1
BM vs EV	6	15330001	15490000	160	28.0779	262	47					1
BM vs EV	6	17650001	17660000	10	12.7646	33	48					1
BM vs EV	7	13890001	13900000	10	8.21596	22	51					1
BM vs EV	7	14510001	14520000	10	16.4334	63	52					1
BM vs EV	7	15000001	15010000	10	8.47719	11	53					1
BM vs EV	8	11000001	11010000	10	9.40863	10	57					1
BM vs EV	8	12660001	12670000	10	8.32089	18	58					1
BM vs EV	8	17320001	17330000	10	11.1116	24	59					1
BM vs EV	8	19290001	19320000	30	11.1318	74	60					1
BM vs EV	8	19900001	19920000	20	8.9909	11	61					1
BM vs EV	8	21750001	21770000	20	25.3213	152	62					1
BM vs EV	9	760001	770000	10	14.699	46	64					1
BM vs EV	9	2770001	3580000	810	10.8557	206	65					1
BM vs EV	9	3970001	3980000	10	13.44	55	66					1
BM vs EV	9	5760001	6310000	550	14.4368	203	67					1
BM vs EV	9	16630001	16640000	10	24.5437	71	68					1
BM vs EV	9	17180001	18180000	1000	14.2889	377	69					1
BM vs EV	9	18940001	18950000	10	26.5638	10	70					1
BM vs EV	9	19350001	19430000	80	22.1066	86	71					1
BM vs EV	10	740001	750000	10	8.28304	12	73					1
BM vs EV	10	7210001	7220000	10	8.52036	65	74					1
BM vs EV	10	9580001	9590000	10	12.425	11	75					1
BM vs EV	10	12500001	12520000	20	9.42422	11	76					1
BM vs EV	10	16300001	16310000	10	12.432	66	77					1
BM vs EV	11	2050001	2060000	10	9.49746	72	80					1
BM vs EV	11	2570001	2580000	10	13.4501	71	81					1
BM vs EV	11	3080001	3130000	50	34.2234	86	82					1
BM vs EV	11	16940001	17080000	140	15.7615	295	83					1
BM vs EV	11	18760001	19260000	500	44.747	49	84					1
BM vs EV	12	3600001	4340000	740	18.9209	116	87					1
BM vs EV	12	10120001	10130000	10	22.133	11	89					1
BM vs EV	12	10860001	10870000	10	12.5102	10	90					1
BM vs EV	12	11820001	11830000	10	11.8451	11	91					1
BM vs EV	12	18010001	18020000	10	14.351	33	92					1
BM vs EV	12	19660001	19690000	30	37.4986	73	93					1
BM vs EV	12	20240001	20470000	230	16.6549	246	94					1
BM vs EV	13	1150001	1350000	200	26.8955	137	95					1
BM vs EV	13	2100001	2230000	130	19.8671	33	96					1
BM vs EV	13	3900001	3950000	50	12.7997	58	97					1
BM vs EV	13	9060001	9070000	10	21.7784	22	98					1
BM vs EV	13	9310001	10700000	1390	34.8806	146	99					1
BM vs EV	13	13800001	13820000	20	33.0593	52	100					1
BM vs EV	13	14930001	14960000	30	7.9255	55	101					1
BM vs EV	13	16890001	16900000	10	8.60052	70	102					1
BM vs EV	13	18020001	18030000	10	32.4945	11	103					1
BM vs EV	14	950001	1250000	300	38.0075	166	104					1
BM vs EV	14	1930001	2460000	530	40.6151	716	105					1
BM vs EV	14	13700001	14110000	410	42.1135	310	106					1
BM vs EV	14	14270001	14690000	420	26.8666	134	107					1
BM vs EV	15	1660001	1670000	10	9.10611	63	108					1
BM vs EV	15	2310001	2840000	530	19.8848	345	109					1
BM vs EV	15	3170001	3270000	100	20.9087	115	110					1
BM vs EV	15	11920001	11940000	20	16.5555	66	111					1
BM vs EV	15	12550001	12560000	10	8.4213	11	112					1

## Sheet: Sheet2
Table S11. Selective sweeps associated with QTL/genomic regions identified in this study and previously which are labeled on their peaks in Figure 5.
Chromosome	Start	End	Selective sweep size (Kb)	XP-CLR score	Total SNPs			QTL	QTL or genomic region denoted in Figure 5	trait	QTL start	QTL end	Marker	Reference
1	1630001	2460000	830	8.80994	142	2	1	QSte.BM.crc-LG1	m-1	STE	2401960	2602160	Lu1_2670961	Kumar et al., 2015
3	4760001	5610000	850	44.9852	165	21	3	QLio.BM.crc-LG3	m-2	LIO	4699827	4900027	Lu3_5950394	Kumar et al., 2015
3	4760001	5610000	850	44.9852	165	21	3	QOle.BM.crc-LG3-1	m-2	OLE	4699827	4900027	Lu3_5950394	Kumar et al., 2015
3	7150001	7410000	260	26.289	66	22	3	QSte.BM.crc-LG3	m-3	STE	7163317	7363517	Lu3_8415336	Kumar et al., 2015
4	13830001	13840000	10	9.66027	174	30	4	QDm.BM.crc-LG4	m-5	DTM	13171757	15042104	-	Kumar et al., 2015
4	13830001	13840000	10	9.66027	174	30	4	QDTM-Lu4.1	7	DTM	13171757	15042104	-	-
4	13830001	13840000	10	9.66027	174	30	4	QYld.BM.crc-LG4	m-4	YLD	13594936	14968389	-	Kumar et al., 2015
4	13830001	13840000	10	9.66027	174	30	4	QYld.BM.crc-LG4	m-5	YLD	13594936	14968389	-	Kumar et al., 2015
4	13830001	13840000	10	9.66027	174	30	4	QYLD-Lu4.1	1	YLD	13594936	14968389	-	-
4	13830001	13840000	10	9.66027	174	30	4	QYLD-Lu4.1	1	YLD	13594936	14968389		-
4	14600001	14610000	10	12.5419	33	31	4	QDm.BM.crc-LG4	m-5	DTM	13171757	15042104	-	Kumar et al., 2015
4	14600001	14610000	10	12.5419	33	31	4	QDTM-Lu4.1	7	DTM	13171757	15042104	-	-
4	14600001	14610000	10	12.5419	33	31	4	QPLH-Lu4.3	4	PLH	14305982	15042104	-	-
4	14600001	14610000	10	12.5419	33	31	4	QYld.BM.crc-LG4	m-4	YLD	13594936	14968389	-	Kumar et al., 2015
4	14600001	14610000	10	12.5419	33	31	4	QYld.BM.crc-LG4	m-5	YLD	13594936	14968389	-	Kumar et al., 2015
4	14600001	14610000	10	12.5419	33	31	4	QYLD-Lu4.1	1	YLD	13594936	14968389	-	-
4	14600001	14610000	10	12.5419	33	31	4	QYLD-Lu4.1	1	YLD	13594936	14968389		-
5	13930001	14270000	340	12.1446	70	40	5	QPAL-Lu5.2	22	PAL	13797851	15668995	-	-
6	13810001	14130000	320	50.5779	315	45	6	QOIL-Lu6.4	13	OIL	13799180	13970951	-	-
7	3800001	3810000	10	14.5944	19	49	7	QPal.BM.crc-LG7;QPAL.crc-LG9;c79-s540_Lu2534	m-6	PAL	624461	5423691	-	Kumar et al.,2015;Cloutier et al.,2011;Soto-Cerda et al.,2014
7	3800001	3810000	10	14.5944	19	49	7	QPAL-Lu7.3	23	PAL	624461	5423691	-	-
7	4800001	5140000	340	17.7442	143	50	7	QPal.BM.crc-LG7;QPAL.crc-LG9;c79-s540_Lu2534	m-6	PAL	624461	5423691	-	Kumar et al.,2015;Cloutier et al.,2011;Soto-Cerda et al.,2014
7	4800001	5140000	340	17.7442	143	50	7	QPAL-Lu7.3	23	PAL	624461	5423691	-	-
7	15690001	16260000	570	18.751	957	54	7	QIOD.crc-LG7;QLIO.crc-LG7;c281-s185_ Lu566	m-7	IOD	15346458	17977459	-	Cloutier et al.,2011;Soto-Cerda et al.,2014
7	15690001	16260000	570	18.751	957	54	7	QIOD-Lu7.2	19	IOD	15346458	17977459	-	-
7	15690001	16260000	570	18.751	957	54	7	QIOD.crc-LG7;QLIO.crc-LG7;c281-s185_ Lu566	m-7	LIN	15425129	17977459	-	Cloutier et al.,2011;Soto-Cerda et al.,2014
7	15690001	16260000	570	18.751	957	54	7	QLIN-Lu7.2	32	LIN	15425129	17977459	-	-
7	15690001	16260000	570	18.751	957	54	7	QIOD.crc-LG7;QLIO.crc-LG7;c281-s185_ Lu566	m-7	LIO	15425129	17977459	-	Cloutier et al.,2011;Soto-Cerda et al.,2014
7	15690001	16260000	570	18.751	957	54	7	QLIO-Lu7.2	29	LIO	15425129	17977459	-	-
7	16440001	17690000	1250	45.7003	1425	55	7	QIOD.crc-LG7;QLIO.crc-LG7;c281-s185_ Lu566	m-7	IOD	15346458	17977459	-	Cloutier et al.,2011;Soto-Cerda et al.,2014
7	16440001	17690000	1250	45.7003	1425	55	7	QIOD-Lu7.2	19	IOD	15346458	17977459	-	-
7	16440001	17690000	1250	45.7003	1425	55	7	QIOD.crc-LG7;QLIO.crc-LG7;c281-s185_ Lu566	m-7	LIN	15425129	17977459	-	Cloutier et al.,2011;Soto-Cerda et al.,2014
7	16440001	17690000	1250	45.7003	1425	55	7	QLIN-Lu7.2	32	LIN	15425129	17977459	-	-
7	16440001	17690000	1250	45.7003	1425	55	7	QIOD.crc-LG7;QLIO.crc-LG7;c281-s185_ Lu566	m-7	LIO	15425129	17977459	-	Cloutier et al.,2011;Soto-Cerda et al.,2014
7	16440001	17690000	1250	45.7003	1425	55	7	QLIO-Lu7.2	29	LIO	15425129	17977459	-	-
7	17920001	18240000	320	10.3494	272	56	7	QIOD.crc-LG7;QLIO.crc-LG7;c281-s185_ Lu566	m-7	IOD	15346458	17977459	-	Cloutier et al.,2011;Soto-Cerda et al.,2014
7	17920001	18240000	320	10.3494	272	56	7	QIOD-Lu7.2	19	IOD	15346458	17977459	-	-
7	17920001	18240000	320	10.3494	272	56	7	QIOD.crc-LG7;QLIO.crc-LG7;c281-s185_ Lu566	m-7	LIN	15425129	17977459	-	Cloutier et al.,2011;Soto-Cerda et al.,2014
7	17920001	18240000	320	10.3494	272	56	7	QLIN-Lu7.2	32	LIN	15425129	17977459	-	-
7	17920001	18240000	320	10.3494	272	56	7	QIOD.crc-LG7;QLIO.crc-LG7;c281-s185_ Lu566	m-7	LIO	15425129	17977459	-	Cloutier et al.,2011;Soto-Cerda et al.,2014
7	17920001	18240000	320	10.3494	272	56	7	QLIO-Lu7.2	29	LIO	15425129	17977459	-	-
8	22550001	22600000	50	12.6437	84	63	8	QOLE-Lu8.1	25	OLE	21782841	23527563	-	-
9	20220001	20400000	180	27.5494	21	72	9	QSTE-Lu9.2	27	STE	20080531	21636823	-	-
10	16660001	16810000	150	22.5695	52	78	10	unamed2	m-8	OIL	16715891	16916072	Lu2262	Soto-Cerda et al.,2014
10	17360001	17830000	470	9.91819	55	79	10	unamed25	m-9	IOD	17374013	17574397	Lu2746	Soto-Cerda et al.,2014
10	17360001	17830000	470	9.91819	55	79	10	unamed19	m-9	LIN	17374013	17574397	Lu2746	Soto-Cerda et al.,2014
12	1170001	1190000	20	8.60022	399	85	12	QIOD.crc-LG16;QLIO.crc-LG16;Llio-LG12.3	m-10	IOD	489561	2981642	-	Cloutier et al.,2011;Soto-Cerda et al.,2014
12	1170001	1190000	20	8.60022	399	85	12	QIOD-Lu12.3	20	IOD	489561	2981642	-	-
12	1170001	1190000	20	8.60022	399	85	12	QIOD.crc-LG16;QLIO.crc-LG16;Llio-LG12.3	m-10	LIN	489561	2981642	-	Cloutier et al.,2011;Soto-Cerda et al.,2014
12	1170001	1190000	20	8.60022	399	85	12	QLIN-Lu12.3	33	LIN	489561	2981642	-	-
12	1170001	1190000	20	8.60022	399	85	12	QIOD.crc-LG16;QLIO.crc-LG16;Llio-LG12.3	m-10	LIO	489561	2981642	-	Cloutier et al.,2011;Soto-Cerda et al.,2014
12	1170001	1190000	20	8.60022	399	85	12	QLIO-Lu12.3	30	LIO	489561	2981642	-	-
12	2480001	2970000	490	106.222	555	86	12	QIOD.crc-LG16;QLIO.crc-LG16;Llio-LG12.3	m-10	IOD	489561	2981642	-	Cloutier et al.,2011;Soto-Cerda et al.,2014
12	2480001	2970000	490	106.222	555	86	12	QIOD-Lu12.3	20	IOD	489561	2981642	-	-
12	2480001	2970000	490	106.222	555	86	12	QIOD.crc-LG16;QLIO.crc-LG16;Llio-LG12.3	m-10	LIN	489561	2981642	-	Cloutier et al.,2011;Soto-Cerda et al.,2014
12	2480001	2970000	490	106.222	555	86	12	QLIN-Lu12.3	33	LIN	489561	2981642	-	-
12	2480001	2970000	490	106.222	555	86	12	QIOD.crc-LG16;QLIO.crc-LG16;Llio-LG12.3	m-10	LIO	489561	2981642	-	Cloutier et al.,2011;Soto-Cerda et al.,2014
12	2480001	2970000	490	106.222	555	86	12	QLIO-Lu12.3	30	LIO	489561	2981642	-	-
12	6860001	6930000	70	27.7737	33	88	12	QOIL-Lu12.6	16	OIL	4591214	7491405	-	-
15	13660001	14760000	1100	8.50085	578	113	15	QOIL-Lu15.7	17	OIL	14665900	15429055	-	-
15	13660001	14760000	1100	8.50085	578	113	15	QPRO-Lu15.1	9	PRO	14746288	14746310	-	-
15	15300001	15580000	280	8.88587	81	114	15	QOIL-Lu15.7	17	OIL	14665900	15429055	-	-
