# Supplementary material for: Genome-Wide Association Study and Selection Signatures Detect Genomic Regions Associated with Seed Yield and Oil Quality in Flax
Source: Preprints.org preprint supplement (doi:10.20944/preprints201807.0397.v2), 2018-08-03
Supplement: Supplementary file 6 [file Table_S12.xlsx]

## Sheet: Sheet2
Table S13: Sequence fragments for QTL with the peak SNPs (upstream 200 bp + SNP + downtream 200 bp)
Trait	Population/ Model	QTL No.	Chr	Peak SNP	Peak position (bp)	Reference allele	alternative allele	Sequence with peak SNP
YLD (t ha-1)	All/GLM(a)	1	4	Lu4-14306304	14306304	G	T	TCAAAATTGAAACAAAACCTCCACAACATAACCCAAACCCAACACATAAAACAAAACAACCTACCCACAGAACCCCAAACACAACTCAGGGGAAGCAAACCCAGAGGCCAAACCAGAAGAAGACACCAGCAGACTCCTCAATCGAGCTCTCTAGAAGAACAACAAAAACGGAGTTAGACGTATGGTTAGTCGTTTGATTA[G/T]TTTGAATGGAGAATTAATGTTAGGCGATAAATTTGTATTTGGTTTCGTGTGACTATTATTTTAAAAATAAAATAAAATACTCAATGATATTTCACTACATGTCGTTTGTATTGGAAGTATGTTTTCACCGGATTATCCTCATTATTTATATAATTAACAAGATTTATTTTAGTTGGGTTGTGGTTAAATAATGG…
	All/GLM(b)	1	4	Lu4-13594936	13594936	C	T	CATATAAAATATTTTTGAGGAAAAAATGAGTTAGTGGATTAGGTTTATTCTTTTGTATATATTTCATGTACATTTGGGGTTAGGTTAGTTGACTTATTCTCATATATTGATTGGTAAATGTTGGTTATGTAATAGGGTCGATGATGGTTATGAGTTTGGTTATGGTGATGGTTTGGTTACTACAAAATCCATAATCTAAC[C/T]TTACCTATTTTTAGTGGTTAACGATCATAACCGTAACTTCAAAATACCCAGTCAACGCGGTTAATAACTGTCAAATTCGGTAAGGGTATAGTCGGTTAAGCGGTCAGAATTGCAAAGCCTAGGAACTGTAACTGTTATGTTAAATGTCAAAGTTGCGTGACTGCTCTATCATAACCTCAAACATTAATGGCTGC…
PLH (cm)	EV/GLM	2	1	Lu1-13930280	13930280	C	A	ACGGCGGCGATGGTGATGAGGGCGGTTGTTGGGTAATGGCGAGACATTGTGTGAAAGGGAAATGCGAGTGGAAATTCGGGGTATTGATGAGTGCCAGAGTGTGGGTATGTGAAGGAATTGGGAAATGATTTTTCTTGAGGAGGAAGAAGAAAGGAAAGTGATTGGGGAAAGTTATCGGATGCGATAGCGGTCTCACTTGT[C/A]ACTACTGTACTGATATGAAAACGGTTCAACCGGTTAAACTCGAAATTAATCATCAAAATGTTAATATTTAATTCAGAAGTTTTTAGTTTAAATTCGATATATTCATCAATTGACATAATAATGTTTAATCATTATTTGACTCCCATTAAAAACAGTTAATACGAATGAGAATACATATAAGGTTGGAGATTAAC…
	BM/GLM	3	1	Lu1-20012490	20012490	A	T	TTTGAATAATGCGTAGTGAATATTAATAACGACCTATTGTTAAAAATGTTAGTACTTCATTATGCCTAATGTTAGAAAATATTAATACTTGCTTATGCTTAATGTTAGAAAGAATTAGTGTACTTATTTCTAATGTTAGAAAATATTAGTAGTTGCCTAATATTATATTAGATACTAATAAGAAATGCATAATATTTTAG[A/T]TTCAATATTTATTAGTACATATTAGGTACATACTTAGCAATGTTAGATACTAATAATCATTGCCTACAATATCGAATAGAAACCTAACGTTACCCTCTTGTGTCGTAGGACGTCTCTCATCCCTCCATACCATCCCCACTTCCGCGCTTTTTTGGAGACTGTCGGACTCTTACCGATTGTTGATCTTGCAAACC…
	BM/GLM	4	4	Lu4-14305982	14305982	C	G	AGAGTAGACGGCGACTGGCGCGGTTGTAGACGGCGGCGGTAATATTCATTCCAATGAACAAGAGACCTGCCGGCCCTTCCATCTCTTCTTTTTTCGGATTATTTACTTTTTGTGGCCTTAAAATTAAGATGATCCATGCTGTAATCATTTAACTCTTTATTGTCTTCAATTTAGTCCCTGACGAACTTACCTTTCCGTCT[C/G]CAACCCGTTTCTGTTTTGACAATTCGATCCCACGATGACAATTTAGATCGAAATGGCTTCTGCGCGGATGGGGTAAAAAATCCGCATGGTGGGTGGATTGTCACATCTCAGCTATTGCAGTTCAAAATTGAAACAAAACCTCCACAACATAACCCAAACCCAACACATAAAACAAAACAACCTACCCACAGAAC…
	All/GLM	5	13	Lu13-17243884	17243884	T	G	GTCAAGTTCATGTTGTAAGAGAGACTTCCAAATGTCAAGATGTGTTTTTTTTTTGCTGTAGCTACTGATATGATTGTAGATTATGAGGGTGTTGGTCAAAAGTAAACGCACAAAAAGAGCAATCCTAGCTACACGAAGCTTTGAACAAGTGTAGATGAGCCAATGGTGTTAGAGGGCAAAGGAGAATGTTGTCTCGAAAT[T/G]GACATTGACGAGCTAGCTTGATAACCAAGCATCAAATTTGAACTCGTCTCGAGCTTGAAATCAAAAACCAATCTTGAGCTTCAGTTTGGGCTTAAGTCAACGACTTACCATGAACAAAATTAAGTCCTAAGAACACTAATCCATTGTTCAAAGCCAAGTATCATCATTCTCTATACATAGCAGCTTATAGAGTC…
	EV/GLM	6	14	Lu14-2320469	2320469	C	G	ATAAGAAAATAGGAAAAGTTAAATTAAAATGACATACGGTGACAGTACTGAGTGGACTCGACATATCATGATGACATGCATGCATTATTTTGGGTTAGCCCATACAGAAATACCACGTGGGAGTGGGCGATTTGTGATGGGATAATGAAATATTATAAAGAATGAAGACAAAATTAATGGAGGCCTACTAATGTCACATG[C/G]CTGTCGTTTTCGGCCTTTAGCCTAGCTTTCACGTATTCACTACTCCAAACGACGAACTAGCCTCAGAAAAATTAGTAGCAGACGAACCACTTTGCCCCATCTCTTCTAGCTATTTGTTAGTTATCGGGTGCTGATGTTGACCTTCCCTTCTTTGCCAACCACTCGCACCTACGACGCCGTAGGCCGCGATAGAT…
DTM (days)	All/GLM	7	4	Lu4-13594936	13594936	C	T	CATATAAAATATTTTTGAGGAAAAAATGAGTTAGTGGATTAGGTTTATTCTTTTGTATATATTTCATGTACATTTGGGGTTAGGTTAGTTGACTTATTCTCATATATTGATTGGTAAATGTTGGTTATGTAATAGGGTCGATGATGGTTATGAGTTTGGTTATGGTGATGGTTTGGTTACTACAAAATCCATAATCTAAC[C/T]TTACCTATTTTTAGTGGTTAACGATCATAACCGTAACTTCAAAATACCCAGTCAACGCGGTTAATAACTGTCAAATTCGGTAAGGGTATAGTCGGTTAAGCGGTCAGAATTGCAAAGCCTAGGAACTGTAACTGTTATGTTAAATGTCAAAGTTGCGTGACTGCTCTATCATAACCTCAAACATTAATGGCTGC…
	BM/GLM	7	4	Lu4-14306304	14306304	G	T	TCAAAATTGAAACAAAACCTCCACAACATAACCCAAACCCAACACATAAAACAAAACAACCTACCCACAGAACCCCAAACACAACTCAGGGGAAGCAAACCCAGAGGCCAAACCAGAAGAAGACACCAGCAGACTCCTCAATCGAGCTCTCTAGAAGAACAACAAAAACGGAGTTAGACGTATGGTTAGTCGTTTGATTA[G/T]TTTGAATGGAGAATTAATGTTAGGCGATAAATTTGTATTTGGTTTCGTGTGACTATTATTTTAAAAATAAAATAAAATACTCAATGATATTTCACTACATGTCGTTTGTATTGGAAGTATGTTTTCACCGGATTATCCTCATTATTTATATAATTAACAAGATTTATTTTAGTTGGGTTGTGGTTAAATAATGG…
	All/MLM	7	4	Lu4-14306304	14306304	G	T	TCAAAATTGAAACAAAACCTCCACAACATAACCCAAACCCAACACATAAAACAAAACAACCTACCCACAGAACCCCAAACACAACTCAGGGGAAGCAAACCCAGAGGCCAAACCAGAAGAAGACACCAGCAGACTCCTCAATCGAGCTCTCTAGAAGAACAACAAAAACGGAGTTAGACGTATGGTTAGTCGTTTGATTA[G/T]TTTGAATGGAGAATTAATGTTAGGCGATAAATTTGTATTTGGTTTCGTGTGACTATTATTTTAAAAATAAAATAAAATACTCAATGATATTTCACTACATGTCGTTTGTATTGGAAGTATGTTTTCACCGGATTATCCTCATTATTTATATAATTAACAAGATTTATTTTAGTTGGGTTGTGGTTAAATAATGG…
	BM/MLM	7	4	Lu4-14306304	14306304	G	T	TCAAAATTGAAACAAAACCTCCACAACATAACCCAAACCCAACACATAAAACAAAACAACCTACCCACAGAACCCCAAACACAACTCAGGGGAAGCAAACCCAGAGGCCAAACCAGAAGAAGACACCAGCAGACTCCTCAATCGAGCTCTCTAGAAGAACAACAAAAACGGAGTTAGACGTATGGTTAGTCGTTTGATTA[G/T]TTTGAATGGAGAATTAATGTTAGGCGATAAATTTGTATTTGGTTTCGTGTGACTATTATTTTAAAAATAAAATAAAATACTCAATGATATTTCACTACATGTCGTTTGTATTGGAAGTATGTTTTCACCGGATTATCCTCATTATTTATATAATTAACAAGATTTATTTTAGTTGGGTTGTGGTTAAATAATGG…
	EV/GLM	8	11	Lu11-14768686	14768686	T	G	TCAATTCATTGACCAGAGAAAAGAAAGGGGTTGGTTGGTTGGCTGGCTAGTTGAGGAAAAGGACTTATGAGGTTGGTGATGTTATTGTAATAATGATATGTAGAACAATAGTAATACAAGTACTAGTACTGGTAATCTCTGCATCGTCATTATTTGAAGGGTTTGTTAATTCAAGTACATACATAAACAAACAAAGCACA[T/G]AAGTAAAGAAAGAGAGGGAGACTGCTGTGTGTTGTTGCAATATAATAATAATGTAGTCATTTACAGAGGAAGACAAACACAAGCAGAGGAAGCGAGCAACAAACACAGGCAGAGGAAGCGAGCAGAGAGCACGAGCAGAGGAAGCGAGGAAATCACCTCGATTTCCAGCGACGAGGTCGATTTCCAGGTGAAGA…
PRO (%)	All/GLM	9	15	Lu15-14746310	14746310	T	C	TCAGTATACAGCTGCTGATTTGCATATGACAAGTGACAATGATGTCGATGTCTCTTCTGCTCTGAATTTAGTGTTTAGTCTTTACGAGCTTGATTCAACCAACCTGAGAGATCTGAGGGAGATGGGACAAAGATTAGCATTTAAACTACATGGTCCTTGGTACCATACCCAAACTTCAGAATTTTCAGCTCTTATACCGC[T/C]ATTTAGTCATTGAAGGGCTCGTCAAAGCAGCTGTGCTAGTATAGTAATTGAAATGAAAAGTGAGCCTGTGCCTGACAGGTAGCCTCTCGAGAAAGCAGTATCGCATGAACTCTAATCCCAAACTCATGAATGCAATTGCATTCAAAGTTGGAAGGAAACAAACCGTCATCACCATGAAGACCTATCCTGGTTAC…
	EV/GLM	9	15	Lu15-14746310	14746310	T	C	TCAGTATACAGCTGCTGATTTGCATATGACAAGTGACAATGATGTCGATGTCTCTTCTGCTCTGAATTTAGTGTTTAGTCTTTACGAGCTTGATTCAACCAACCTGAGAGATCTGAGGGAGATGGGACAAAGATTAGCATTTAAACTACATGGTCCTTGGTACCATACCCAAACTTCAGAATTTTCAGCTCTTATACCGC[T/C]ATTTAGTCATTGAAGGGCTCGTCAAAGCAGCTGTGCTAGTATAGTAATTGAAATGAAAAGTGAGCCTGTGCCTGACAGGTAGCCTCTCGAGAAAGCAGTATCGCATGAACTCTAATCCCAAACTCATGAATGCAATTGCATTCAAAGTTGGAAGGAAACAAACCGTCATCACCATGAAGACCTATCCTGGTTAC…
OIL (%)	All/GLM	10	2	Lu2-21913720	21913720	G	A	GCTTACATGATATGTGGTGTGGGATTGGCGATTTTTCTTTTTCCCCAGAAAGGAGACACAATCCTGTAGCTGGAAAGGCAATTACAACAGCGCGGCCAGTGGACGAAATAAAGGTTTCTTCGGCCAAGAAAGATGGGCAGTTTAGAAGAACGTCATCTTACGCAGATGCTGCATCGTCAGATGCATCATCTTTCATGGAA[G/A]TGCTTAAGAAACCAGTTGCCCATGAACCGGATGCAGGAAATGCTAGTAACTTAGAGTCGTTTGAAGCAGGACGAAGCGGGAAGAAGAAGGGGAAAAAGGGGAGGCAGATTGATCCTGCTCTTCTTGGCTTTAAAGTCTCGAGTAACCGGATCATGATGGGTGAAATCCAGCACCCTGATGATTAACTTTAGCTG…
	All/GLM	11	5	Lu5-15704628	15704628	A	C	TATAGGTCTCTTGCTACCTAGGTCAATGAGAATTTCTAATCATATTCAAGCGCGCTTCAACGTCATATTTCATCAAAAAAATAGTAACCCAACTCGTTGTATCATATAGCCTTTGCAAATCCAACCTAACACCTGGTACTCATCCGACATCCACCTCTTTTTTGGGCTAAATTATCCGAACAAAAAGACCCGTTGACAGG[A/C]ATGAATACACCCGAAACCCATAAAAATCAGGTAGTAAGAGGGGACGGATTTAACAGTATCCGTCTCGAAACACACCCGACAGGCAACCCGCTTACATACGGCATAGTTTTGGCATTCATGATTCTGAACAAATTTTATGAATTTTGAACGTTAAGTTACCTTTTTGATTTTGAGAGTTATGCACTGTTTCTTGG…
	All/MLM	11	5	Lu5-15704628	15704628	A	C	TATAGGTCTCTTGCTACCTAGGTCAATGAGAATTTCTAATCATATTCAAGCGCGCTTCAACGTCATATTTCATCAAAAAAATAGTAACCCAACTCGTTGTATCATATAGCCTTTGCAAATCCAACCTAACACCTGGTACTCATCCGACATCCACCTCTTTTTTGGGCTAAATTATCCGAACAAAAAGACCCGTTGACAGG[A/C]ATGAATACACCCGAAACCCATAAAAATCAGGTAGTAAGAGGGGACGGATTTAACAGTATCCGTCTCGAAACACACCCGACAGGCAACCCGCTTACATACGGCATAGTTTTGGCATTCATGATTCTGAACAAATTTTATGAATTTTGAACGTTAAGTTACCTTTTTGATTTTGAGAGTTATGCACTGTTTCTTGG…
	All/GLM	12	6	Lu6-4879632	4879632	G	A	AACTACCCGACATAAAATTCTCAATAAGTTCAACCGAAAAGAAATAACTGGAATATAAAGAAAGCAAGAAACAGCTATTGGAGCCCGAACTGGGGACACGCAAAACTTCAAACGCCTGGAGGGGTTAAGTCTCCGAGCAAGTCTCTGTCGTTGTATTACTTCTCCTAGCAGGACCTGGTGTTCAAGCTTGCCGATGCCAA[G/A]TTTTTTGGGTGTTCCTAGATACCTCGAACGCTGCCACTTAGTCTTCTTCGACCATCCACAGTGCGTCCGTTTCTCATTCCACATCATCATCCTCTCGTCTAGGTGAAACATCGCCATCGTCGATTTGTAGCCGAGAGAAAGAACCAAAAGCCCTAACCATCTGTTGTTTCAAGGAACCTTTGTTGTATTTTGTT…
	All/GLM	13	6	Lu6-13970520	13970520	A	T	CATTGGAGTATCATTAGGCACTAGCAAGAGCACAAAGACAATCAAGCCCCTCATGGCAGCCTTGAGTTTCCATCAATTTTTCGAAGGTCTCGGCCTTGCCGGCTCAATCTCACAAGTAACTAATCAGTACTCTTCCATATCCCTATTACGAACACAGAATATAGATATTTATAAAACCTACGTGTCCGTTCATAATTAAT[A/T]TCAGGCAAATTTGAAGCTAAGAACAAGGATACTGATGGCGACATTCTTCTCGTTGACAACTCCGATTGGGATAGGGATAGGGATGGCGATATCGAGCAACTACGGAGACAACAACCCTAACTCTATAATCGTACAAGGAATCTTCACTTCGGCATCCGCTGGGATTCTAGTCTACATGGCTCTCGTGGATCTAT…
	All/GLM	14	7	Lu7-14209179	14209179	G	A	GATGGCAGTGGCCCTTCAACATTCGGACTACACTATGGCGGGCTAGTCGTCTTGACGAAGCACATGTGAAAGGCTAACATCTAGTCACGCTGCAAGAGGCTGAGAAACTGAAGCACGAGGCTGGTGCGATGGCTCCTCTGCCGTCATTTGCAGAAGTGACGGTTCTATTGTCGAGTCCATCTACAAGGCTACCATCTGAT[G/A]TCCAAGCAACCAAGCCAAGCGGAGATCTTCAGTGGCTACCATTTAATAGAACAACTCCTGAGATTGATGGCTTACACTTTTAATTATAAGCGATCTTGCTAATCTCTTATCATGTCCTAACTGCTCTCAGTCGGGATGATGAAAAAAGAAATTTTTAAAATTAACTATAACCCAACCATATAGTGTCGGTTTCC…
	All/GLM	15	10	Lu10-6517448	6517448	T	C	TTAGCCAAGATTGACCTCAAAAATTTTGGTTTGTGTCGAGTTTAAACCTATTCGAGTCTGGTTTGTTAACTATTATTGACGAGCCAAATTCGAGTTCAACTCAAACTTCGCTCATTAAAACCCACAACGAGAAGTCCAGTTTGAGTTGAATTTGAAGCTTGTCCGCTTAAAAACACCGACAAGTCAAGCTATAAACCAAG[T/C]TATCATAAAAGCTATAAGTTTTTACATATGTTATGGTGTATGTTGTTTGAGGCAAGACACATGTTGCATTATTGAGTCTACTGACGAGCCATATTATCACGTTAGTACAAGAGTTGGCCCTCGAGCTCAAGCTATAACCAGCTCACGAGCCTATCGAGTCGAACATACCCTGACTCAAACTCTTGGCTCTTTTC…
	All/GLM	16	12	Lu12-6708984	6708984	G	A	ACAAGTGCAGAACTGAAATAAAGGCTGCAATAGAGAGAAATGTAACACAGTGAATCACAATTAGTGCCAAACTGGCGACTGAATAAAACCATAGGTATAAGAGAGTAGTTCTAGTAAATCAACGACTGACCAAAATAGGGAACCCTTGCGATGGTTTCAAGAACATAGAACCTAGCATAATCTCGATCGTGGTAGAATGT[G/A]TCGAGAATCTTTATCACTGTATCCTGACAATATTAATATAACCATATGAAAAGCAGAAACAAACTAAAAGATTTTTTTTTCGATGAATAAACTAATAGATTTCAGTATGGGGACAGTACACAAACTATGCAAATTTTGAATTTGAAAAATGGAAAGTAGAGAAGAATAAGTGAAAATGACGATGTTGGAAGTGG…
	EV/GLM	17	15	Lu15-14665900	14665900	T	C	GATCAACCTCGTGTTGGAGGCACTCTAGCAATTGATATTTCACACTGTCGCATTTCAGCCACCTCTTCCTCGACGTTATTCCACCACACGGTGTAGCAAGGCCGAATCGCGGCCCCAAGTGCCCAACTTCTGAGCACATCTATCCAGGCTTCATCAAAAGAGCCCGTCGATCCCTCCCCCAACCATCAAGAATGCTATCA[T/C]GTAGAAGCCTGTGATTTATTATATGCTATGAAACATATATCCAGAACAAATTATAAGAACAATCAATGGGTCGGAAACACAACACTTTGTTTCTTAATTAAAACTTGTTTTATTTTGTGGGTTTTGTTTTTGTTTTATGTGAGGTGATGATGTCCTGTCACATTCTCCACATTCTCTCCCTTTCTTCGATCGGC…
IOD	All/MLM	18	4	Lu4-19909467	19909467	A	G	ATAACGACTATAACAATCGAGGTGGAGAATAAAAGTGGGGTATTGGTTTGATTAGCACTATAACAATCGAGGTGGGGAATAAAAGTGGGATATTGGTTTGATTAGCCAAAGTATGTAATATATTATTGCAATTATGTAATGCATATTTNNNNNNNNNNNNNNNNNNNNNNNNNNNNNNNNNNNAATAGTGATGGAAGTGA[A/G]TGGATAATTAAGAACAAAAAACAAGACTGCTCATATACAAATAAGAAGCCCACTCTCAAAATTTACTTTTGCTGAATGTTGATGATGCCCAGTAGCTCCAACCCTTATAATTTTGGCTGCAATGAATACTCATGCTAGTAGTAGCATCAAAGAAGACACACAAGTTGATCTTTCTTGTTGACTAGCCTAAAAGT…
	All/GLM	19	7	Lu7-16848770	16848770	C	A	TTCCCACTCCACCGCTAACCAGAAGAACATGATTGCTAAACTGAAGGGTGATAATGAGAGGTAGATTGACGACGAGAACAGCCTTAAAATTATGGCGTATGACTATTTCAGCAAGCTGTTTACAGCCAGGGATCAAGGCCAACCCTTGGAGTGGCCTAGAAGGCTTTCCGCAGCTTGTCTCTCAGTAGATGAATAATGAC[C/A]TTTGCAGGGACATTTCAGATGAAGAAATAAGAGTGGTTGTCTTCTCCATGGACGTGGACAAGGCCATGGGGTCCGACGGGTTTTCCGGCGATTTCTACAGGTCCTTTTGGTCTTCGGTGGGCAGTGAGATGTGTAAAGAGATCAAGGGTTTCTTCCGCTCAACCACGATACCTCATGGATGGAACTCCACCCTC…
	SU/GLM	19	7	Lu7-16817334	16817334	A	G	ACGGAGCTAGGATTTATAGAAAGACTAGTGTAGTTATTATTTGATGAAATGCGGTGAAAACTAATTGATTTATGTGAAGAGATGATCATAATGTGAGGGAAAAGACCCATCAGCAATGGAAATTTATTGAGCTGCTTTGTTTCAGCGAAACTAAATGCAACTTCAGTTGGTAATTTGACTGTATCCTGGCCGAGCAAACA[A/G]CGTCAGCGTCAATCACTCCGAGTCAATGGTCTATTTGGTGGGAAGAAAGATGGCGATGATGCATCTTCAAAGGTTGGACTTGTTAATGCTTCTTCTCTTGTTGATCATTGTACGAAACCTTTGTGTATATAAGCTATTTTCTTGGATCTTCAATCTGTTTCACTTCTTTGACAAGTCACGGTTTTGAATTATAT…
	EV/GLM	19	7	Lu7-16233470	16233470	T	G	TGGTGATAACTGACTGGATGAAGCGTTTCACCTTCGGAAGGGACTCCAGTTCCATTTGAGACCCGACACAAGTTTTGCAACAAACATATTAGTCCATCTGTAATTTTGGCCGTTGATCTTATCCAACGCTCCTTAAATCCAACAAGATAGCAACGATGATGAAGCTGAACTTGCCCCCGAAAAAGACACGTGAGAATTTC[T/G]CATTTTCAGACTGAGTGAACATTTCATCATGGAATATGTACTTACTTGAAAAAAGGTGGACCATATGCAGAGCATATGAGAGGAAGAGGAAAAACAAACGACGACAGACAATTAGGATTAGCCGTAAAGTTGTCTTCTTACGTGACCCGAACGAACATCACAAATCTATTGACCATTTTCATGGCTATCTCGAG…
	All/MLM	19	7	Lu7-16848770	16848770	C	A	TTCCCACTCCACCGCTAACCAGAAGAACATGATTGCTAAACTGAAGGGTGATAATGAGAGGTAGATTGACGACGAGAACAGCCTTAAAATTATGGCGTATGACTATTTCAGCAAGCTGTTTACAGCCAGGGATCAAGGCCAACCCTTGGAGTGGCCTAGAAGGCTTTCCGCAGCTTGTCTCTCAGTAGATGAATAATGAC[C/A]TTTGCAGGGACATTTCAGATGAAGAAATAAGAGTGGTTGTCTTCTCCATGGACGTGGACAAGGCCATGGGGTCCGACGGGTTTTCCGGCGATTTCTACAGGTCCTTTTGGTCTTCGGTGGGCAGTGAGATGTGTAAAGAGATCAAGGGTTTCTTCCGCTCAACCACGATACCTCATGGATGGAACTCCACCCTC…
	All/GLM	20	12	Lu12-1633507	1633507	G	A	GAATTATGAAAAGGGAACAATGACTTATAGCTGGGGAAGACCAATTTGGCTAGCTAGGCGGCTTCCACATTTTTTTACACCAGATACGTATTATTTGCGAGTTATATGTACACCACGTGTGAACGGTATGGTTTTCGTGGGTAAACTTTTGCAGTGCAGACAGTAATAGTCCCAGTAACTGTGATAATTCATTTAATAAC[G/A]TAGAAATAACATGTGAGTATAAATAAATCAAGACTAACACGAGAATAATAGACTCAAACCCAAACTCAAAATCGAAAATACAAATGGACAACATAGGAATACTACACAAAAACTGTCACCTCGACGTGAATCGGGAGCAGGGAATAATTTTTGATGATCGATTTCATCAAATGAAAAGAAAGAAAGCAGAATGA…
	All/MLM	20	12	Lu12-1542711	1542711	A	G	TCAGAGTAGGTAGCTGTCTTATCAGATTGTACGACATCTAGCTCCGCCGACATCAGAGTTTCAGAAGAAAACAATGAGGTTATTATGCCCTGGAATTCATCAGGAACATCTACTTCCACCCATGTCTCTTGATCAAGTACAGCCTTCATTTTGGTCATCTAGAAAGTTGAGTGCATGTAAGCTTTAAGGTGTATTAAGAT[A/G]CCTATAAAGGGTAACAGAACATAAAAGATGATGACCAACCCGTATCTCATGCTGCAAATCAACAAATGCTTTGGCCTGAGACTGCAATGTTCCACGTATACTATATCCTAATCTTCCACCAACCTGTTCATGTTATTTACAAAAACAGTACCATGAGCACATAAACACTATTCTCTCAAGTCTCCACCTATAAG…
	EV/GLM	20	12	Lu12-1633507	1633507	G	A	GAATTATGAAAAGGGAACAATGACTTATAGCTGGGGAAGACCAATTTGGCTAGCTAGGCGGCTTCCACATTTTTTTACACCAGATACGTATTATTTGCGAGTTATATGTACACCACGTGTGAACGGTATGGTTTTCGTGGGTAAACTTTTGCAGTGCAGACAGTAATAGTCCCAGTAACTGTGATAATTCATTTAATAAC[G/A]TAGAAATAACATGTGAGTATAAATAAATCAAGACTAACACGAGAATAATAGACTCAAACCCAAACTCAAAATCGAAAATACAAATGGACAACATAGGAATACTACACAAAAACTGTCACCTCGACGTGAATCGGGAGCAGGGAATAATTTTTGATGATCGATTTCATCAAATGAAAAGAAAGAAAGCAGAATGA…
	SU/GLM	20	12	Lu12-1633507	1633507	G	A	GAATTATGAAAAGGGAACAATGACTTATAGCTGGGGAAGACCAATTTGGCTAGCTAGGCGGCTTCCACATTTTTTTACACCAGATACGTATTATTTGCGAGTTATATGTACACCACGTGTGAACGGTATGGTTTTCGTGGGTAAACTTTTGCAGTGCAGACAGTAATAGTCCCAGTAACTGTGATAATTCATTTAATAAC[G/A]TAGAAATAACATGTGAGTATAAATAAATCAAGACTAACACGAGAATAATAGACTCAAACCCAAACTCAAAATCGAAAATACAAATGGACAACATAGGAATACTACACAAAAACTGTCACCTCGACGTGAATCGGGAGCAGGGAATAATTTTTGATGATCGATTTCATCAAATGAAAAGAAAGAAAGCAGAATGA…
PAL (%)	All/GLM	21	5	Lu5-12062376	12062376	A	G	TATAAGAGTAGTAACAAGTTCAACTACGAGGATACTCGTTGTTCAACCTTTGAAAGCAAAGTTGTATAGAAAGTTAAATACTAGATAAAAAGACACCAGAATTTTCATCAAAAATTGTTATGATAAAAAGTATGTATCATCAGATAATTCAATTAATATGGATTAAGTTCACTTTAATATTATGCGACTCGTTCGACGGT[A/G]CTGAGTTTTCTTTTTCAAATTGAATTGTGACTTCTCATAAATTTCAATTTTTTGTTTCTTGGTTTGTGTATATATTAGTGTGACTTTTTTTTTACCGTGGTGATTATGACTTAGATGGTGAAAGGAGTTGGGGGATGGGTAGGTAAACCGTAGTAAATATGGTGACTGGTAAGAAAAATTGATGCTGTGAATTT…
	All/GLM	22	5	Lu5-15503464	15503464	G	C	CCAAATCCAAGAGCCATTTGACATTTTGAGAGTCCATAAATCTTTATTCAACACCCCCTCCTCAGGGGAATAAATGACGCCCAAATATACTTCAAAGTATTTGCAGAATTCCAAAAATATAAATCCTTAAAGGTCAATCCCACCTTCTATTTTAGGAAAAGTTAGAAAGTGTCAAGTCACTTTATAGTGAGCTCCATCAA[G/C]CACCCCCCATAGAAATTGATCACAAAGCTGTTCAATATCTTTTAGAAGAGTCTCAGGAAGAAGGAAGACAAACATCCAGTATTGAAAAATACCTTCAATCATCGAAGAAATTAGATGGAGCTTACCAACATTAGTGTAACTTTTAGCCTTCCAAATAAAATTTTACAATCGGCAACTTTGAGTTTACGTTGAAT…
	All/GLM	23	7	Lu7-1187005	1187005	G	A	ATACTATGTAATCAACAAAGAAACTATGTCATCAGAATATGAGCATCACGGCAAATCTGTTTCGCGCAAGATCTCCAGCATTCCGTCTTCGTTTGTCAACATGGTGGCGACACCACTTGTACCAAACCGTGCCATTTATGGCTCTCCAAATAAGATTTGAATTTCGAAAATTTACATAAGATTTCATTATTTTCGGATCA[G/A]AATTCTTGTCGGTACTCGATGACCTAGGTTGGTCCACCCTAATTCCATCACTGCCGAAATAATTCGACAGGTCAAAAAAAATATTTAAACCTAAAGAACCCATCAAAATTAAACAATTAGAAACGAAAAAAAAGACATTGAAGAGGAAGGAGAGAGGAGTGGTCGGTGATAAAGGGGTCATAGTAATTGAAGAC…
	SU/GLM	23	7	Lu7-747411	747411	C	T	CGGGATATGGAGCTAGTAACGAAAGACAACTTACGATGCGGTTTTTTTTCAATCTCAGGAGCACCAATATCCCTTTTTCGAGATATTTTATCCAGTGAACTTTTTACTCATCTTTGTACACGGTGCAACAATTTGTACACATGTACATATCGTTTTATTCGTACATATTGTTTTTTTACTTGTATATGAGTTTGTACATA[C/T]TCGTTGTACATAAATTATGGTCAAGTCCACGATGTTGAGAGATGGCAAGAACCTATTGAACGAGGGAAGAGTTCAATTTTCGAATTAATCTCAACCACTAGATCGATAATGATTCACTACGTGTCAAGATCTTATCCTAACATGATTAAAGAATTTTCTTCATGCGAGTCCAAATCCCACTGTCGAAATCATTC…
	All/MLM	23	7	Lu7-1187005	1187005	G	A	ATACTATGTAATCAACAAAGAAACTATGTCATCAGAATATGAGCATCACGGCAAATCTGTTTCGCGCAAGATCTCCAGCATTCCGTCTTCGTTTGTCAACATGGTGGCGACACCACTTGTACCAAACCGTGCCATTTATGGCTCTCCAAATAAGATTTGAATTTCGAAAATTTACATAAGATTTCATTATTTTCGGATCA[G/A]AATTCTTGTCGGTACTCGATGACCTAGGTTGGTCCACCCTAATTCCATCACTGCCGAAATAATTCGACAGGTCAAAAAAAATATTTAAACCTAAAGAACCCATCAAAATTAAACAATTAGAAACGAAAAAAAAGACATTGAAGAGGAAGGAGAGAGGAGTGGTCGGTGATAAAGGGGTCATAGTAATTGAAGAC…
	EV/GLM	23	7	Lu7-969909	969909	T	C	AATTTTAAACACATATAATATATGTATATGTACTATGTACTATTTGAATAAAAAAATGAATTTATGGTAACTAGACCATACATCACCTGAATATTTTAAATGATAAAAATAATATTTACCTAATTATTTTCAAAACACCCATTTAAATTGCAACATTTTTTTTATAAATAAATTTTTGATATTTATTCCTCAAAGACGAT[T/C]GTAAACGAGCATACAAAGTGTCTATCGAAGGTATAGACTCAACAGGCGGAGTTATATGAAATGTGGGTTTTTGCGCATGCGGCAATCTCTCATTCTTTTCTCACCGACAACGGACAACGATAAAGGAAAACAAGTCACAACGTAAAGACATCGAAAGAGACAGACCAAAATCTAGCTAATGGATGAAACATTCG…
	EV/MLM	23	7	Lu7-969932	969932	T	C	GTATATGTACTATGTACTATTTGAATAAAAAAATGAATTTATGGTAACTAGACCATACATCACCTGAATATTTTAAATGATAAAAATAATATTTACCTAATTATTTTCAAAACACCCATTTAAATTGCAACATTTTTTTTATAAATAAATTTTTGATATTTATTCCTCAAAGACGATTGTAAACGAGCATACAAAGTGTC[T/C]ATCGAAGGTATAGACTCAACAGGCGGAGTTATATGAAATGTGGGTTTTTGCGCATGCGGCAATCTCTCATTCTTTTCTCACCGACAACGGACAACGATAAAGGAAAACAAGTCACAACGTAAAGACATCGAAAGAGACAGACCAAAATCTAGCTAATGGATGAAACATTCGATACTTATCTAAATCACTATCGG…
	All/GLM	24	11	Lu11-4429424	4429424	A	T	CCAGTATGGTGTGTACCTTCTGAAGCGATCATGCATTTGCTTTCTGGCTGTATTCATTTGAGTTTTTGCTATAAGTGTGAAGATATTCCTCGTTCAGAATAAGTCTAGTGGTCACTTATGTATATGATGCATGTGTTTGTGAATGAATTGGTGCATGCTTTATATCACATATGCCCTCTTATCATGAATCGTTGTCTTCT[A/T]GATTTATCTTTATTCTTGGTGTTTTGGCTATCGAAATTGCGAGGATAGTTATATCCACATATTTTTATTTAATGTTGCATTCGTGCTATCCATTCCTTTTGTTCGAGCAGCACGTAGAATAGTATATCAGTGGCCTCCCCCTTAGCCGCTGTCAAGCTACATCATTGTGAACTTCTTGAACTCCTTTCTATTGG…
OLE (%)	All/GLM	25	8	Lu8-22386322	22386322	A	G	CTAAATCCGTACGATAAAAGATCAATAAATTCGGGAGGGAACATGAGAGAGAATACACTGAGTAATAAATTAATTTGATATCCACATTTATGAAGCCAGCACTTTGTTAAAATAGGTGTCATTTATGTCTTCGTCGTAAAATCAAGACGAACCTGCCAACGTAAACTCAACATGAACTGACGTGCCTCGCATCGCATACC[A/G]CCGGATTTCCAGAACACCTTTGGAACACGAACGTACCGCGCTCACGACGATCAATCGGACGACCAGGAGCAGAGTAAAAATTAGGGGTGGAAGGCCCCCTTTCCGCGCTAGAATAAAATCAGTTTCAAGATAATGGAACCAGGCCAGTAAGATGTAATATTATTATGTGCACTGGCTTGAATGGTGGGTACAGT…
	SU/GLM	25	8	Lu8-22386322	22386322	A	G	CTAAATCCGTACGATAAAAGATCAATAAATTCGGGAGGGAACATGAGAGAGAATACACTGAGTAATAAATTAATTTGATATCCACATTTATGAAGCCAGCACTTTGTTAAAATAGGTGTCATTTATGTCTTCGTCGTAAAATCAAGACGAACCTGCCAACGTAAACTCAACATGAACTGACGTGCCTCGCATCGCATACC[A/G]CCGGATTTCCAGAACACCTTTGGAACACGAACGTACCGCGCTCACGACGATCAATCGGACGACCAGGAGCAGAGTAAAAATTAGGGGTGGAAGGCCCCCTTTCCGCGCTAGAATAAAATCAGTTTCAAGATAATGGAACCAGGCCAGTAAGATGTAATATTATTATGTGCACTGGCTTGAATGGTGGGTACAGT…
STE (%)	All/GLM	26	9	Lu9-4229230	4229230	A	C	AATGGCAGCCCCAAACAAACAACCGCAGAAACAAATTGTCCTCATTCTTTCGAGGGAGAAGCCGACTCCGGCCAGACGCTAATCTTCTCCTTCTCGTACTTCATATACACCGCCGACACCGCCGCCACGAAGTAGATCTGAACCATCACGATCGCCGGCGTGTGGTAGCTGAGCATGCTCTTCCCAGTGGCCAGCTCCAC[A/C]AGCAGCGGAGCCGCAAGCCCCAGGAACGAGATCCTTCCGTTCACTTTCTCGCTGTACGGAGTGAATCCGAACTCCACTTTTAATCCTGCAGAGGTCGGCTCCTTCAGCGGCACCGGAGGTAGGTAGAGGGTCGATCCGGACGCTGCGGCGGCGGCTCCTTTCTTCCTAGCCTTCCGCATCTCCGCCTTCTTCCC…
	All/GLM	27	9	Lu9-21627283	21627283	G	A	GGTATGTGTTCTTGCCTCGTTGCTTGGTAGAGGACGTTTGTTGGTGATTGTAGTCTGACATGGCATCTCGCCGTTGTTTTCGTGCAGATTGGACAGTTCCATACTTTGGAAATCGAGCTGCATCGTCCCTTTGTTTTGAGAAAAGTATGTGATTTATGGTTCTCTCTGTCTATGTCCATGCTAATAGTGGCATTTATCTG[G/A]TATTACTTGGTATCAACCTGCTTACTATTTCCATTGTGAATACGGGCTTATGGCATTGAATATTGTTCATTCCAGAAAATTTGGGATTCGTTGGCATTGGAGGTTATCAAGCAAGCCTCAGGTATAGTGAGCTGACCAGATTTAAATCTCTCTGATGATAATAAATTAACTTGAGACATCAGCATTAGCTGCAA…
	All/MLM	27	9	Lu9-21627283	21627283	G	A	GGTATGTGTTCTTGCCTCGTTGCTTGGTAGAGGACGTTTGTTGGTGATTGTAGTCTGACATGGCATCTCGCCGTTGTTTTCGTGCAGATTGGACAGTTCCATACTTTGGAAATCGAGCTGCATCGTCCCTTTGTTTTGAGAAAAGTATGTGATTTATGGTTCTCTCTGTCTATGTCCATGCTAATAGTGGCATTTATCTG[G/A]TATTACTTGGTATCAACCTGCTTACTATTTCCATTGTGAATACGGGCTTATGGCATTGAATATTGTTCATTCCAGAAAATTTGGGATTCGTTGGCATTGGAGGTTATCAAGCAAGCCTCAGGTATAGTGAGCTGACCAGATTTAAATCTCTCTGATGATAATAAATTAACTTGAGACATCAGCATTAGCTGCAA…
LIO (%)	All/GLM	28	4	Lu4-19909467	19909467	A	G	ATAACGACTATAACAATCGAGGTGGAGAATAAAAGTGGGGTATTGGTTTGATTAGCACTATAACAATCGAGGTGGGGAATAAAAGTGGGATATTGGTTTGATTAGCCAAAGTATGTAATATATTATTGCAATTATGTAATGCATATTTNNNNNNNNNNNNNNNNNNNNNNNNNNNNNNNNNNNAATAGTGATGGAAGTGA[A/G]TGGATAATTAAGAACAAAAAACAAGACTGCTCATATACAAATAAGAAGCCCACTCTCAAAATTTACTTTTGCTGAATGTTGATGATGCCCAGTAGCTCCAACCCTTATAATTTTGGCTGCAATGAATACTCATGCTAGTAGTAGCATCAAAGAAGACACACAAGTTGATCTTTCTTGTTGACTAGCCTAAAAGT…
	All/GLM	29	7	Lu7-16848770	16848770	C	A	TTCCCACTCCACCGCTAACCAGAAGAACATGATTGCTAAACTGAAGGGTGATAATGAGAGGTAGATTGACGACGAGAACAGCCTTAAAATTATGGCGTATGACTATTTCAGCAAGCTGTTTACAGCCAGGGATCAAGGCCAACCCTTGGAGTGGCCTAGAAGGCTTTCCGCAGCTTGTCTCTCAGTAGATGAATAATGAC[C/A]TTTGCAGGGACATTTCAGATGAAGAAATAAGAGTGGTTGTCTTCTCCATGGACGTGGACAAGGCCATGGGGTCCGACGGGTTTTCCGGCGATTTCTACAGGTCCTTTTGGTCTTCGGTGGGCAGTGAGATGTGTAAAGAGATCAAGGGTTTCTTCCGCTCAACCACGATACCTCATGGATGGAACTCCACCCTC…
	SU/GLM	29	7	Lu7-16817334	16817334	A	G	ACGGAGCTAGGATTTATAGAAAGACTAGTGTAGTTATTATTTGATGAAATGCGGTGAAAACTAATTGATTTATGTGAAGAGATGATCATAATGTGAGGGAAAAGACCCATCAGCAATGGAAATTTATTGAGCTGCTTTGTTTCAGCGAAACTAAATGCAACTTCAGTTGGTAATTTGACTGTATCCTGGCCGAGCAAACA[A/G]CGTCAGCGTCAATCACTCCGAGTCAATGGTCTATTTGGTGGGAAGAAAGATGGCGATGATGCATCTTCAAAGGTTGGACTTGTTAATGCTTCTTCTCTTGTTGATCATTGTACGAAACCTTTGTGTATATAAGCTATTTTCTTGGATCTTCAATCTGTTTCACTTCTTTGACAAGTCACGGTTTTGAATTATAT…
	EV/GLM	29	7	Lu7-16233470	16233470	T	G	TGGTGATAACTGACTGGATGAAGCGTTTCACCTTCGGAAGGGACTCCAGTTCCATTTGAGACCCGACACAAGTTTTGCAACAAACATATTAGTCCATCTGTAATTTTGGCCGTTGATCTTATCCAACGCTCCTTAAATCCAACAAGATAGCAACGATGATGAAGCTGAACTTGCCCCCGAAAAAGACACGTGAGAATTTC[T/G]CATTTTCAGACTGAGTGAACATTTCATCATGGAATATGTACTTACTTGAAAAAAGGTGGACCATATGCAGAGCATATGAGAGGAAGAGGAAAAACAAACGACGACAGACAATTAGGATTAGCCGTAAAGTTGTCTTCTTACGTGACCCGAACGAACATCACAAATCTATTGACCATTTTCATGGCTATCTCGAG…
	All/MLM	29	7	Lu7-16848770	16848770	C	A	TTCCCACTCCACCGCTAACCAGAAGAACATGATTGCTAAACTGAAGGGTGATAATGAGAGGTAGATTGACGACGAGAACAGCCTTAAAATTATGGCGTATGACTATTTCAGCAAGCTGTTTACAGCCAGGGATCAAGGCCAACCCTTGGAGTGGCCTAGAAGGCTTTCCGCAGCTTGTCTCTCAGTAGATGAATAATGAC[C/A]TTTGCAGGGACATTTCAGATGAAGAAATAAGAGTGGTTGTCTTCTCCATGGACGTGGACAAGGCCATGGGGTCCGACGGGTTTTCCGGCGATTTCTACAGGTCCTTTTGGTCTTCGGTGGGCAGTGAGATGTGTAAAGAGATCAAGGGTTTCTTCCGCTCAACCACGATACCTCATGGATGGAACTCCACCCTC…
	All/GLM	30	12	Lu12-1633507	1633507	G	A	GAATTATGAAAAGGGAACAATGACTTATAGCTGGGGAAGACCAATTTGGCTAGCTAGGCGGCTTCCACATTTTTTTACACCAGATACGTATTATTTGCGAGTTATATGTACACCACGTGTGAACGGTATGGTTTTCGTGGGTAAACTTTTGCAGTGCAGACAGTAATAGTCCCAGTAACTGTGATAATTCATTTAATAAC[G/A]TAGAAATAACATGTGAGTATAAATAAATCAAGACTAACACGAGAATAATAGACTCAAACCCAAACTCAAAATCGAAAATACAAATGGACAACATAGGAATACTACACAAAAACTGTCACCTCGACGTGAATCGGGAGCAGGGAATAATTTTTGATGATCGATTTCATCAAATGAAAAGAAAGAAAGCAGAATGA…
	All/MLM	30	12	Lu12-1542711	1542711	A	G	TCAGAGTAGGTAGCTGTCTTATCAGATTGTACGACATCTAGCTCCGCCGACATCAGAGTTTCAGAAGAAAACAATGAGGTTATTATGCCCTGGAATTCATCAGGAACATCTACTTCCACCCATGTCTCTTGATCAAGTACAGCCTTCATTTTGGTCATCTAGAAAGTTGAGTGCATGTAAGCTTTAAGGTGTATTAAGAT[A/G]CCTATAAAGGGTAACAGAACATAAAAGATGATGACCAACCCGTATCTCATGCTGCAAATCAACAAATGCTTTGGCCTGAGACTGCAATGTTCCACGTATACTATATCCTAATCTTCCACCAACCTGTTCATGTTATTTACAAAAACAGTACCATGAGCACATAAACACTATTCTCTCAAGTCTCCACCTATAAG…
	EV/GLM	30	12	Lu12-1176253	1176253	C	T	CAATTCTTCATTCGCTATCCCGTACTATCTCTTCTATCTTCTCTTACATTTTCGCTGTACATATCTATCTGTTTAGTGATTCGTTTCTTTCTGTTTCTGGCATTCCTCATTGTCACACTGGGTAGAAGCTTTTGCACTACTTGATTTTGGCTGCCCATTTGAGCAATTTTGTGTGTTTGCACTTATTGCTCTTGATTTCG[C/T]TTCCTTCGGTTTGTTTGAAATCCCTGGGAAGGACAAACGGGCGTTTCCTTGTTGCTTTTTGAATTAATTGTGCTAAAGTGTATGGCGCTCCTGTTGGCCAACCGATTATTTTCCTAATTGGTTGGTTTCTACAGGGTAGTGTAGTTCCATTGGAGTTGTGACTATGTATTTGTTGAAGGCATTTTCTAACTTGA…
	SU/GLM	30	12	Lu12-1633507	1633507	G	A	GAATTATGAAAAGGGAACAATGACTTATAGCTGGGGAAGACCAATTTGGCTAGCTAGGCGGCTTCCACATTTTTTTACACCAGATACGTATTATTTGCGAGTTATATGTACACCACGTGTGAACGGTATGGTTTTCGTGGGTAAACTTTTGCAGTGCAGACAGTAATAGTCCCAGTAACTGTGATAATTCATTTAATAAC[G/A]TAGAAATAACATGTGAGTATAAATAAATCAAGACTAACACGAGAATAATAGACTCAAACCCAAACTCAAAATCGAAAATACAAATGGACAACATAGGAATACTACACAAAAACTGTCACCTCGACGTGAATCGGGAGCAGGGAATAATTTTTGATGATCGATTTCATCAAATGAAAAGAAAGAAAGCAGAATGA…
	EV/MLM	30	12	Lu12-2579513	2579513	T	C	CTTGATAACCTAACTTATATGACCTTTACATGTCGATAACTCGGTAGGCCTACACGACCATCTTATCCTCCTAATGATTTTAGAAAATAAAATATTTTTTTCAAAATAAGTATTTTTTTTTTCTTGTGAATTATTTGGTCATGGAGGGATGGGTCGTTTTGATAGGAAAAAGAAGGGTAGAGAATTAAAGGCAGTAGTAG[T/C]AGAGAGAGTCAGCAAAAGGGAAGGAAAGCTGCTTGACCTAAACAGTCTTCTGTCTTCTTCATTTCAATCAACAAACAAACAAACAATATCCAAACAAAACAAAAACAAATTGGTTAGCCTTTACAGCAAACTTCTGTCTGCAAAGGAACAAAAGGCTGCGGTTTCTCTGTTTTGTATTATATATGTTGGTGGGA…
LIN (%)	All/MLM	31	4	Lu4-19909467	19909467	A	G	ATAACGACTATAACAATCGAGGTGGAGAATAAAAGTGGGGTATTGGTTTGATTAGCACTATAACAATCGAGGTGGGGAATAAAAGTGGGATATTGGTTTGATTAGCCAAAGTATGTAATATATTATTGCAATTATGTAATGCATATTTNNNNNNNNNNNNNNNNNNNNNNNNNNNNNNNNNNNAATAGTGATGGAAGTGA[A/G]TGGATAATTAAGAACAAAAAACAAGACTGCTCATATACAAATAAGAAGCCCACTCTCAAAATTTACTTTTGCTGAATGTTGATGATGCCCAGTAGCTCCAACCCTTATAATTTTGGCTGCAATGAATACTCATGCTAGTAGTAGCATCAAAGAAGACACACAAGTTGATCTTTCTTGTTGACTAGCCTAAAAGT…
	All/GLM	32	7	Lu7-16848770	16848770	C	A	TTCCCACTCCACCGCTAACCAGAAGAACATGATTGCTAAACTGAAGGGTGATAATGAGAGGTAGATTGACGACGAGAACAGCCTTAAAATTATGGCGTATGACTATTTCAGCAAGCTGTTTACAGCCAGGGATCAAGGCCAACCCTTGGAGTGGCCTAGAAGGCTTTCCGCAGCTTGTCTCTCAGTAGATGAATAATGAC[C/A]TTTGCAGGGACATTTCAGATGAAGAAATAAGAGTGGTTGTCTTCTCCATGGACGTGGACAAGGCCATGGGGTCCGACGGGTTTTCCGGCGATTTCTACAGGTCCTTTTGGTCTTCGGTGGGCAGTGAGATGTGTAAAGAGATCAAGGGTTTCTTCCGCTCAACCACGATACCTCATGGATGGAACTCCACCCTC…
	SU/GLM	32	7	Lu7-16817334	16817334	A	G	ACGGAGCTAGGATTTATAGAAAGACTAGTGTAGTTATTATTTGATGAAATGCGGTGAAAACTAATTGATTTATGTGAAGAGATGATCATAATGTGAGGGAAAAGACCCATCAGCAATGGAAATTTATTGAGCTGCTTTGTTTCAGCGAAACTAAATGCAACTTCAGTTGGTAATTTGACTGTATCCTGGCCGAGCAAACA[A/G]CGTCAGCGTCAATCACTCCGAGTCAATGGTCTATTTGGTGGGAAGAAAGATGGCGATGATGCATCTTCAAAGGTTGGACTTGTTAATGCTTCTTCTCTTGTTGATCATTGTACGAAACCTTTGTGTATATAAGCTATTTTCTTGGATCTTCAATCTGTTTCACTTCTTTGACAAGTCACGGTTTTGAATTATAT…
	EV/GLM	32	7	Lu7-16233470	16233470	T	G	TGGTGATAACTGACTGGATGAAGCGTTTCACCTTCGGAAGGGACTCCAGTTCCATTTGAGACCCGACACAAGTTTTGCAACAAACATATTAGTCCATCTGTAATTTTGGCCGTTGATCTTATCCAACGCTCCTTAAATCCAACAAGATAGCAACGATGATGAAGCTGAACTTGCCCCCGAAAAAGACACGTGAGAATTTC[T/G]CATTTTCAGACTGAGTGAACATTTCATCATGGAATATGTACTTACTTGAAAAAAGGTGGACCATATGCAGAGCATATGAGAGGAAGAGGAAAAACAAACGACGACAGACAATTAGGATTAGCCGTAAAGTTGTCTTCTTACGTGACCCGAACGAACATCACAAATCTATTGACCATTTTCATGGCTATCTCGAG…
	All/MLM	32	7	Lu7-16848770	16848770	C	A	TTCCCACTCCACCGCTAACCAGAAGAACATGATTGCTAAACTGAAGGGTGATAATGAGAGGTAGATTGACGACGAGAACAGCCTTAAAATTATGGCGTATGACTATTTCAGCAAGCTGTTTACAGCCAGGGATCAAGGCCAACCCTTGGAGTGGCCTAGAAGGCTTTCCGCAGCTTGTCTCTCAGTAGATGAATAATGAC[C/A]TTTGCAGGGACATTTCAGATGAAGAAATAAGAGTGGTTGTCTTCTCCATGGACGTGGACAAGGCCATGGGGTCCGACGGGTTTTCCGGCGATTTCTACAGGTCCTTTTGGTCTTCGGTGGGCAGTGAGATGTGTAAAGAGATCAAGGGTTTCTTCCGCTCAACCACGATACCTCATGGATGGAACTCCACCCTC…
	All/GLM	33	12	Lu12-1633507	1633507	G	A	GAATTATGAAAAGGGAACAATGACTTATAGCTGGGGAAGACCAATTTGGCTAGCTAGGCGGCTTCCACATTTTTTTACACCAGATACGTATTATTTGCGAGTTATATGTACACCACGTGTGAACGGTATGGTTTTCGTGGGTAAACTTTTGCAGTGCAGACAGTAATAGTCCCAGTAACTGTGATAATTCATTTAATAAC[G/A]TAGAAATAACATGTGAGTATAAATAAATCAAGACTAACACGAGAATAATAGACTCAAACCCAAACTCAAAATCGAAAATACAAATGGACAACATAGGAATACTACACAAAAACTGTCACCTCGACGTGAATCGGGAGCAGGGAATAATTTTTGATGATCGATTTCATCAAATGAAAAGAAAGAAAGCAGAATGA…
	All/MLM	33	12	Lu12-1574479	1574479	G	T	AAACGGTGATCTCAAAATGTGTTGGATTACACGTCAATGAAATGGAAGGAGTTGAGTGTTATTTATAAGTGTGAGGAAAAATCTCATTTATAAGTTAATTTTTTTGGGTGAAAAGGTCCGATAGCATCCAATAATGATATCAAAACTTAGGTTAANAAATAATACATAAATATAAATATATAATAATAAAATAAAAGAAG[G/T]CTCGGCGGGAAACGTAGGTATGGAAATAACTAATAAGTAGAACAAAAAAAGGAAACGACTTTATTTCTTATTCTTGTGAAGTTGGTGGGATCAATTGGAAGCAGCCGGAGGTGTGGCGCCGCCGACTGGAGGGAAGGGGAAANNNNNNNNNNNNNNNNNNNNNNNNNNNNNNNNNNNNNNNNNNNNNNNNNNNN…
	EV/GLM	33	12	Lu12-1633507	1633507	G	A	GAATTATGAAAAGGGAACAATGACTTATAGCTGGGGAAGACCAATTTGGCTAGCTAGGCGGCTTCCACATTTTTTTACACCAGATACGTATTATTTGCGAGTTATATGTACACCACGTGTGAACGGTATGGTTTTCGTGGGTAAACTTTTGCAGTGCAGACAGTAATAGTCCCAGTAACTGTGATAATTCATTTAATAAC[G/A]TAGAAATAACATGTGAGTATAAATAAATCAAGACTAACACGAGAATAATAGACTCAAACCCAAACTCAAAATCGAAAATACAAATGGACAACATAGGAATACTACACAAAAACTGTCACCTCGACGTGAATCGGGAGCAGGGAATAATTTTTGATGATCGATTTCATCAAATGAAAAGAAAGAAAGCAGAATGA…
	SU/GLM	33	12	Lu12-1633507	1633507	G	A	GAATTATGAAAAGGGAACAATGACTTATAGCTGGGGAAGACCAATTTGGCTAGCTAGGCGGCTTCCACATTTTTTTACACCAGATACGTATTATTTGCGAGTTATATGTACACCACGTGTGAACGGTATGGTTTTCGTGGGTAAACTTTTGCAGTGCAGACAGTAATAGTCCCAGTAACTGTGATAATTCATTTAATAAC[G/A]TAGAAATAACATGTGAGTATAAATAAATCAAGACTAACACGAGAATAATAGACTCAAACCCAAACTCAAAATCGAAAATACAAATGGACAACATAGGAATACTACACAAAAACTGTCACCTCGACGTGAATCGGGAGCAGGGAATAATTTTTGATGATCGATTTCATCAAATGAAAAGAAAGAAAGCAGAATGA…
Note: The QTL numbers correspond to the numbers in Table 3 and Supplimentary Table S4. For YLD, QTL were identified only using the phenotyping data obtained in Morden in 2010 (a) and Saskatoon in 2012 (b)
