# Supplementary material for: Genome-Wide Association Study and Selection Signatures Detect Genomic Regions Associated with Seed Yield and Oil Quality in Flax
Source: Preprints.org preprint supplement (doi:10.20944/preprints201807.0397.v2), 2018-08-03
Supplement: Supplementary file 7 [file Table_S6.xlsx]

## Sheet: single_year_GWAS_results_10M.tx
Table S6. QTL identified using the combined population and phenotypes of individual environments
Trait	Environment	QTL No	QTL	Known QTL	Chr	No of SNPs	Start Pos	End Pos	Peak SNP	Peak Pos	Peak R2	Peak allele1	Peak allele2	Peak_effect	Max -log(p)	h2(gwas)	h2(standard error)
DTM	2012S	7	QDTM-Lu4.1		4	15	12113902	15098378	Lu4-14360460	14360460	0.09511	C	T	3.36978	7.84753	0.077183	0.054508
DTM	2010M	7	QDTM-Lu4.1		4	23	13171757	15098378	Lu4-14306304	14306304	0.18943	G	T	6.34193	12.46	0.2	0.109215
DTM	2010S	7	QDTM-Lu4.1		4	13	13593536	15042104	Lu4-14306304	14306304	0.33152	G	T	1.47764	7.95222	0	0
DTM	2010S				14	1	15746669	15746669	Lu14-15746669	15746669	0.21847	A	G	1.50375	5.55007	0	0
IOD	2010S	19	QIOD-Lu7.2		7	7	5344628	8787316	Lu7-6908494	6908494	0.07433	G	T	13.2714	6.12899	0.06719	0.057191
IOD	2010S	19	QIOD-Lu7.2		7	50	14540706	17977459	Lu7-16848770	16848770	0.17833	A	C	20.3848	14.6207	0.524039	0.126483
IOD	2010M	19	QIOD-Lu7.2		7	42	15442037	17977459	Lu7-16848770	16848770	0.15922	A	C	16.8905	13.662	0.351887	0.133413
IOD	2011M	19	QIOD-Lu7.2		7	37	15442037	17977459	Lu7-16848770	16848770	0.14074	A	C	15.1942	12.1776	0.512562	0.132843
IOD	2012S	19	QIOD-Lu7.2		7	36	15442037	17705650	Lu7-16848770	16848770	0.14237	A	C	15.1528	11.8579	0.596277	0.123152
IOD	2012M	19	QIOD-Lu7.2		7	22	15458939	17115499	Lu7-16848770	16848770	0.10562	A	C	11.6695	9.34019	0.465053	0.148413
IOD	2010S	20	QIOD-Lu12.3		12	100	48692	2981642	Lu12-1633507	1633507	0.22882	A	G	-19.683	20.3122	0.373933	0.117306
IOD	2010M	20	QIOD-Lu12.3		12	77	486821	2981642	Lu12-1633507	1633507	0.21184	A	G	-16.335	20.0561	0.304862	0.111105
IOD	2011M	20	QIOD-Lu12.3		12	65	897390	2981642	Lu12-1633507	1633507	0.18566	A	G	-14.689	17.56	0.222866	0.10236
IOD	2012S	20	QIOD-Lu12.3		12	60	897390	2981642	Lu12-1633507	1633507	0.18123	A	G	-14.512	16.2865	0.192582	0.094407
IOD	2012M	20	QIOD-Lu12.3		12	52	920109	2981642	Lu12-1633507	1633507	0.15482	A	G	-11.937	14.8224	0.179155	0.096338
LIN	2012M	30	QLIN-Lu4.1		4	1	19909467	19909467	Lu4-19909467	19909467	0.06061	A	G	-29.014	5.63125	0.453258	0.36419
LIN	2010S	31	QLIN-Lu7.2		7	3	6908187	6908494	Lu7-6908494	6908494	0.0673	G	T	13.9232	5.765	0.079007	0.104102
LIN	2010S	31	QLIN-Lu7.2		7	52	14540706	17984212	Lu7-16848770	16848770	0.17268	A	C	22.1328	14.6832	0.536781	0.127117
LIN	2011M	31	QLIN-Lu7.2		7	42	14540706	17977459	Lu7-16848770	16848770	0.14422	A	C	17.175	12.4958	0.535106	0.126948
LIN	2010M	31	QLIN-Lu7.2		7	42	15346458	17977459	Lu7-16848770	16848770	0.15929	A	C	18.8186	13.9097	0.467913	0.134964
LIN	2012M	31	QLIN-Lu7.2		7	28	15442037	17226132	Lu7-16848770	16848770	0.10487	A	C	13.1642	9.21896	0.585714	0.13844
LIN	2012S	31	QLIN-Lu7.2		7	35	15442037	17705650	Lu7-16848770	16848770	0.13708	A	C	16.6565	11.6753	0.593867	0.123312
LIN	2010S	32	QLIN-Lu12.3		12	100	48692	2981642	Lu12-1633507	1633507	0.2222	A	G	-21.381	20.4949	0.366805	0.116296
LIN	2010M	32	QLIN-Lu12.3		12	89	486821	2981642	Lu12-1633507	1633507	0.21938	A	G	-18.563	21.1793	0.349541	0.113832
LIN	2011M	32	QLIN-Lu12.3		12	65	897390	2981642	Lu12-1633507	1633507	0.18935	A	G	-16.591	17.8301	0.231759	0.103277
LIN	2012S	32	QLIN-Lu12.3		12	61	897390	2981642	Lu12-1633507	1633507	0.18143	A	G	-16.277	16.7003	0.192384	0.093289
LIN	2012M	32	QLIN-Lu12.3		12	57	920109	2981642	Lu12-1633507	1633507	0.16448	A	G	-13.97	15.633	0.193496	0.097837
LIO	2010M	27	QLIO-Lu4.1		4	1	19909467	19909467	Lu4-19909467	19909467	0.05867	A	G	34.8182	5.68712	0.448332	0.363724
LIO	2012M	27	QLIO-Lu4.1		4	1	19909467	19909467	Lu4-19909467	19909467	0.06005	A	G	30.6128	5.7389	0.456815	0.364475
LIO	2010M	28	QLIO-Lu7.2		7	46	14540706	17977459	Lu7-16848770	16848770	0.14477	A	C	-18.96	13.5338	0.576963	0.125179
LIO	2010S	28	QLIO-Lu7.2		7	52	14540706	17984212	Lu7-16848770	16848770	0.16432	A	C	-21.407	14.5723	0.516437	0.129782
LIO	2011M	28	QLIO-Lu7.2		7	44	14540706	17977459	Lu7-16848770	16848770	0.13299	A	C	-17.515	12.3195	0.592174	0.124867
LIO	2012M	28	QLIO-Lu7.2		7	27	15442037	17226132	Lu7-16848770	16848770	0.09684	A	C	-13.431	8.82789	0.573199	0.149905
LIO	2012S	28	QLIO-Lu7.2		7	34	15442037	17705149	Lu7-16848770	16848770	0.12649	A	C	-16.485	11.3658	0.61182	0.120435
LIO	2010M	29	QLIO-Lu12.3		12	94	48692	2981642	Lu12-1633507	1633507	0.20415	A	G	18.9233	20.962	0.336632	0.113705
LIO	2010S	29	QLIO-Lu12.3		12	100	48692	2981642	Lu12-1633507	1633507	0.21338	A	G	20.7502	20.5726	0.358617	0.115536
LIO	2011M	29	QLIO-Lu12.3		12	64	897390	2981642	Lu12-1633507	1633507	0.17458	A	G	16.8938	17.3844	0.221397	0.101194
LIO	2012S	29	QLIO-Lu12.3		12	64	897390	2981642	Lu12-1633507	1633507	0.17365	A	G	16.3914	16.8356	0.209433	0.097191
LIO	2012M	29	QLIO-Lu12.3		12	53	920109	2981642	Lu12-1633507	1633507	0.1599	A	G	14.6184	15.6431	0.203212	0.101334
OIL	2010M	10	QOIL-Lu2.1		2	1	21913720	21913720	Lu2-21913720	21913720	0.02646	A	G	-3.7046	5.91193	0.104884	0.148437
OIL	2010S	10	QOIL-Lu2.1		2	1	21913720	21913720	Lu2-21913720	21913720	0.03429	A	G	-5.3713	5.76556	0.107308	0.151111
OIL	2011M	10	QOIL-Lu2.1		2	1	21913720	21913720	Lu2-21913720	21913720	0.0313	A	G	-3.8768	7.02052	0.151558	0.196041
OIL	2012M	10	QOIL-Lu2.1		2	1	21913720	21913720	Lu2-21913720	21913720	0.02395	A	G	-3.0834	5.80008	0.133991	0.178871
OIL	2010S				4	3	14305982	14561815	Lu4-14306304	14306304	0.04586	G	T	-2.5601	7.61753	0.082908	0.085036
OIL	2010M	11	QOIL-Lu5.2		5	3	15704607	15705039	Lu5-15704628	15704628	0.0368	A	C	-2.919	8.37537	0.382955	0.214142
OIL	2011M	11	QOIL-Lu5.2		5	3	15704607	15705039	Lu5-15704628	15704628	0.03089	A	C	-2.5712	7.10916	0.28497	0.191375
OIL	2010S	11	QOIL-Lu5.2		5	1	15704628	15704628	Lu5-15704628	15704628	0.03618	A	C	-3.6925	6.13711	0.262936	0.285616
OIL	2010M	12	QOIL-Lu6.3		6	1	4879632	4879632	Lu6-4879632	4879632	0.03233	A	G	4.68479	5.81636	0.113043	0.164314
OIL	2010M	12	QOIL-Lu6.3		6	1	13970520	13970520	Lu6-13970520	13970520	0.02846	A	T	4.6963	6.3019	0.147365	0.193886
OIL	2011M	13	QOIL-Lu6.4		6	1	4879632	4879632	Lu6-4879632	4879632	0.03666	A	G	4.73107	6.60413	0.13396	0.185595
OIL	2011M	13	QOIL-Lu6.4		6	5	13799180	13970951	Lu6-13970520	13970520	0.0315	A	T	4.761	6.99332	0.156332	0.191056
OIL	2010M	14	QOIL-Lu7.4		7	1	14209179	14209179	Lu7-14209179	14209179	0.02763	A	G	6.61811	6.37337	0.476755	0.372936
OIL	2011M	14	QOIL-Lu7.4		7	1	14209179	14209179	Lu7-14209179	14209179	0.02843	A	G	6.45541	6.58132	0.506851	0.371462
OIL	2012M	14	QOIL-Lu7.4		7	1	14209179	14209179	Lu7-14209179	14209179	0.02303	A	G	5.27757	5.79721	0.420547	0.369176
OIL	2010M			Qoil.BM.crc-LG8	8	1	14317635	14317635	Lu8-14317635	14317635	0.02469	G	T	-1.4883	5.67801	0.093015	0.124518
OIL	2010M	16	QOIL-Lu12.6		12	28	4591214	7491405	Lu12-4591214	4591214	0.02793	A	G	-6.6181	6.22702	0.035998	0.073751
OIL	2011M	16	QOIL-Lu12.6		12	28	4591214	7491405	Lu12-7300034	7300034	0.02925	C	T	6.48695	6.52612	0.042219	0.07864
OIL	2012M	16	QOIL-Lu12.6		12	27	4591214	7491405	Lu12-7300034	7300034	0.02386	C	T	5.30472	5.70952	0.02886	0.062958
OLE	2010M	24	QOLE-Lu8.1		8	57	21390839	23298218	Lu8-22386322	22386322	0.0754	A	G	3.63782	10.9447	0.141524	0.112759
OLE	2012S	24	QOLE-Lu8.1		8	70	21703475	23527563	Lu8-22662923	22662923	0.0636	C	T	-2.1137	9.7258	0.114403	0.089231
OLE	2012M	24	QOLE-Lu8.1		8	49	22191938	23527563	Lu8-22386322	22386322	0.06843	A	G	2.80202	8.37004	0.155772	0.141164
OLE	2011M	24	QOLE-Lu8.1		8	8	22386322	22611742	Lu8-22611461	22611461	0.04999	C	T	-2.5864	7.53993	0.182495	0.153756
OLE	2010M				9	2	4021957	4021967	Lu9-4021957	4021957	0.04009	C	T	-3.4133	6.04948	0.276391	0.295019
PAL	2010M				2	1	8207833	8207833	Lu2-8207833	8207833	0.05537	C	T	1.51667	6.36924	0.617859	0.347457
PAL	2010M	21	QPAL-Lu5.1		5	1	6822695	6822695	Lu5-6822695	6822695	0.05538	C	T	-1.5167	6.35558	0.477686	0.370843
PAL	2010M	21	QPAL-Lu5.1		5	1	9810099	9810099	Lu5-9810099	9810099	0.05556	C	G	-1.5128	6.35421	0.454091	0.370868
PAL	2010M	21	QPAL-Lu5.1		5	9	12062376	15668995	Lu5-15599010	15599010	0.06138	C	T	-1.2325	6.34483	0.152758	0.102741
PAL	2012M	21	QPAL-Lu5.1		5	2	14571864	14973748	Lu5-14973748	14973748	0.04728	A	G	0.34947	5.96605	0.075409	0.082845
PAL	2010S	21	QPAL-Lu5.1		5	2	15503464	15503476	Lu5-15503464	15503464	0.07123	C	G	-0.55329	6.37259	0.140854	0.178078
PAL	2012S	21	QPAL-Lu5.1		5	1	15668995	15668995	Lu5-15668995	15668995	0.04867	A	G	-0.35955	5.66432	0.061811	0.085811
PAL	2010M	22	QPAL-Lu7.2		7	106	624461	4428631	Lu7-1187005	1187005	0.15703	A	G	0.63075	18.4782	0.411755	0.124348
PAL	2010S	22	QPAL-Lu7.2		7	121	624461	6010546	Lu7-1187005	1187005	0.17115	A	G	0.67029	15.3405	0.308004	0.127509
PAL	2011M	22	QPAL-Lu7.2		7	104	624461	5135582	Lu7-1187005	1187005	0.14084	A	G	0.5838	18.6543	0.289079	0.124767
PAL	2012M	22	QPAL-Lu7.2		7	83	624461	4321040	Lu7-1187005	1187005	0.13562	A	G	0.50573	17.3536	0.359168	0.138194
PAL	2012S	22	QPAL-Lu7.2		7	108	624461	5135582	Lu7-1187005	1187005	0.18385	A	G	0.5292	22.2267	0.325251	0.117965
PAL	2010S	22	QPAL-Lu7.2		7	1	14602323	14602323	Lu7-14602323	14602323	0.0631	A	C	-0.66702	5.5514	0.119607	0.157162
PAL	2010S				8	1	16527153	16527153	Lu8-16527153	16527153	0.06266	C	G	-1.3544	5.64651	0.486755	0.369785
PAL	2010M				9	1	7127663	7127663	Lu9-7127663	7127663	0.05537	A	G	-1.5167	6.36924	0.617859	0.347457
PAL	2010M	23	QPAL-Lu11.3		11	1	4429424	4429424	Lu11-4429424	4429424	0.04881	A	T	0.46266	5.58744	0.06053	0.084162
PLH	2012S	4	QPLH-Lu4.3		4	3	14305982	14561815	Lu4-14561815	14561815	0.06393	A	G	8.00956	5.88452	0.068745	0.073806
PRO	2012M				5	1	1597410	1597410	Lu5-1597410	1597410	0.05449	C	T	1.01361	6.17686	0.150048	0.188544
PRO	2012M				8	43	15165079	20226632	Lu8-15169343	15169343	0.0604	C	T	1.06054	6.79352	0.102423	0.10088
PRO	2012M				14	1	5400110	5400110	Lu14-5400110	5400110	0.05892	A	C	-1.1507	6.35175	0.060592	0.0841
PRO	2011M	9	QPRO-Lu15.1		15	1	1053335	1053335	Lu15-1053335	1053335	0.04289	C	T	-0.68395	5.62091	0.084087	0.113784
STE	2010M	25	QSTE-Lu9.1		9	1	4229230	4229230	Lu9-4229230	4229230	0.05305	A	C	1.65544	5.94176	0.502053	0.369077
STE	2011M	25	QSTE-Lu9.1		9	1	4229230	4229230	Lu9-4229230	4229230	0.05216	A	C	1.5977	5.97893	0.503945	0.368955
STE	2010S	26	QSTE-Lu9.2		9	10	20037880	21636823	Lu9-20080531	20080531	0.09272	A	G	-0.43308	8.64491	0.113921	0.077546
STE	2012M	26	QSTE-Lu9.2		9	3	21627029	21627283	Lu9-21627029	21627029	0.06127	C	T	0.4204	5.98255	0.062455	0.06689
STE	2012S	26	QSTE-Lu9.2		9	3	21627029	21636823	Lu9-21627029	21627029	0.06057	C	T	0.29995	5.7837	0.057616	0.062169
STE	2010M	26	QSTE-Lu9.2		9	1	21627283	21627283	Lu9-21627283	21627283	0.06223	A	G	0.5242	6.68311	0.089144	0.1193
YLD	2012S	1	QYLD-Lu4.1		4	1	13594936	13594936	Lu4-13594936	13594936	0.0351	C	T	-2.4989	5.7164	0.051714	0.074631
YLD	2010M	1	QYLD-Lu4.1		4	11	13831239	15145498	Lu4-14306304	14306304	0.09563	G	T	-4.9108	8.80953	0.124737	0.084029
