# Supplementary material for: Genome-Wide Association Study and Selection Signatures Detect Genomic Regions Associated with Seed Yield and Oil Quality in Flax
Source: Preprints.org preprint supplement (doi:10.20944/preprints201807.0397.v2), 2018-08-03
Supplement: Supplementary file 8 [file Table_S7.xlsx]

## Sheet: Table S10
Table S7. Significant tests of QTL effects in different year/location enviroments and different populations
										-LOG10(P)
Trait	QTL No.	Chr	Peak SNP	Peak position (bp)	Peak allele1	Peak allele2			Year/location environment							Population
							2009/Morden	2009/Saskatoon	2010/Morden	2010/Saskatoon	2011/Morden	2011/Saskatoon	2012/Morden	2012Saskatoon	BM	EV	SU	Merged
YLD	1	4	Lu4-14306304	14306304	G	T	0.44	2.11**	7.21**	0.48	3.21**	1.89*	5.89**	2.09**	1.95*	0.54	0.81	4.41**
PLH	2	1	Lu1-13930280	13930280	A	C		0.23		2.00**	1.50*	2.18**	0.48	0.96	0.43	2.02**	0.14	2.20**
PLH	3	1	Lu1-20012490	20012490	A	T		1.13		2.05**	2.04**	4.28**	1.92*	2.03**	3.62**	0.04	1.38*	0.03
PLH	4	4	Lu4-14305982	14305982	C	G		1.1		0.16	6.51**	2.35**	2.50**	1.62*	3.63**	0.19	0.15	3.96**
PLH	5	13	Lu13-17243884	17243884	G	T				8.27**	3.06**	2.41**	1.96*	3.04**		2.29**		5.66**
PLH	6	14	Lu14-2320469	2320469	C	G		0.56		0.12	2.46**	3.59**	1.97*	1.92*	0.55	2.72**	0.12	2.43**
DTM	7	4	Lu4-14306304	14306304	G	T	2.00**	1.94*	3.91**		3.26**	1.98**	3.79**	2.31**	4.68**	0.28	0.19	0.48
DTM	8	11	Lu11-14768686	14768686	G	T			4.53**		3.75**	0.35	2.55**	1	0.4	3.81**	0.38	1.94*
PRO	9	15	Lu15-14746310	14746310	C	T					29.82**	25.72**	22.94**	30.69**		8.02**		36.35**
OIL	10	2	Lu2-21913720	21913720	A	G			10.44**	8.90**	11.95**	13.22**	12.98**	12.07**		0.55	0.12	12.48**
OIL	11	5	Lu5-15704628	15704628	A	C			28.66**	28.19**	30.66**	19.87**	20.82**	20.17**			0.47	29.72**
OIL	12	6	Lu6-4879632	4879632	A	G	0.72	0.69	7.08**	9.82**	8.40**	4.64**	4.78**	4.86**	0.67	0.73	0	6.49**
OIL	13	6	Lu6-13970520	13970520	A	T	0.36	0.35	6.60**	7.75**	7.99**	7.72**	7.28**	7.37**	0.14	0.39	0.24	8.01**
OIL	14	7	Lu7-14209179	14209179	A	G	0.32	0.28	3.25**	3.78**	3.66**	1.99*	2.56**	3.1**	0.11	0.64		3.40**
OIL	15	10	Lu10-6517448	6517448	C	T	0.51	0.51	3.10**	3.41**	3.41**	2.00**	2.53**	3.08**	0.26	0.64	0.07	3.34**
OIL	16	12	Lu12-6708984	6708984	A	G	0.74	0.03	1.72*	0.38	2.51**	7.93**	3.87**	3.49**	0.44			2.8**
OIL	17	15	Lu15-14665900	14665900	C	T			26.43**	25.44**	28.87**	30.45**	32.68**	29.41**		9.43**		32.31**
IOD	18	4	Lu4-19909467	19909467	A	G	0.32	0.16	2.31**	0.52	2.96**	3.44**	2.38**	1.98*	0.19	0.1	3.54**	2.25**
IOD	19	7	Lu7-16848770	16848770	A	C	0.32	0.07	3.32**	3.24**	2.92**	3.13**	1.93*	2.68**	0.16	2.45**	5.31**	3.27**
IOD	20	12	Lu12-1633507	1633507	A	G	0.15	0.29	10.36**	10.37**	9.07**	9.90**	7.68**	9.14**	0.49	10.26**	5.90**	10.24**
PAL	21	5	Lu5-12062376	12062376	A	G	0.17	0.09	25.66**	12.81**	27.6**	27.31**	25.35**	20.19**	0.48	1.47*	2.47**	25.96**
PAL	22	5	Lu5-15503464	15503464	C	G			3.05**	3.25**	2.46**	3.05**	2.52**	2.62**	0.29	0.36	3.07**	0.23
PAL	23	7	Lu7-1187005	1187005	A	G	0.8	0.13	9.64**	8.94**	9.42**	8.97**	9.11**	10.65**	0.17	4.23**	11.08**	10.81**
PAL	24	11	Lu11-4429424	4429424	A	T			4.30**	5.40**	3.92**	6.75**	2.96**	7.13**			2.74**	6.06**
OLE	25	8	Lu8-22386322	22386322	A	G			16.61**	7.30**	13.55**	10.98**	15.61**	14.59**			9.09**	16.95**
STE	26	9	Lu9-4229230	4229230	A	C	0.11	0.12	12.98**	12.59**	13.4**	16.41**	10.76**	10.45**	0.42	1.63*	3.48**	13.81**
STE	27	9	Lu9-21627283	21627283	A	G	0.46	0.49	5.05**	2.72**	4.20**	4.26**	5.04**	4.55**	0.16	0.7	3.28**	4.78**
LIO	28	4	Lu4-19909467	19909467	A	G			3.50**	2.49**	3.52**	3.58**	3.49**	3.11**	0.54	0.17	3.41**	0.33
LIO	29	7	Lu7-16848770	16848770	A	C	1.15	1.99*	1.94*	2.40**	1.77*	2.15**	1.14	1.75*	0.73	2.07**	5.86**	2.12**
LIO	30	12	Lu12-1633507	1633507	A	G	0.47	0.66	9.48**	9.71**	8.08**	9.54**	7.63**	8.14**	0.21	10.77**	7.08**	9.40**
LIN	31	4	Lu4-19909467	19909467	A	G			3.51**	2.56**	3.56**	3.63**	3.63**	3.26**	0.36	0.14	3.48**	0.96
LIN	32	7	Lu7-16848770	16848770	A	C	0.2	0.41	2.59**	2.78**	2.36**	2.66**	1.50*	2.30**	0.34	2.15**	5.86**	2.63**
LIN	33	12	Lu12-1633507	1633507	A	G	0.21	0.44	10.35**	10.05**	8.85**	10.00**	7.94**	8.77**	0.5	10.35**	7.04**	10.05**
t test and Wilcox non-parameteric test were performed for each QTL in different year/location environments or different populations. The P values are the lowest P values obtained from two methods. * and ** represent the statistical significance at 0.05 (-long10(0.05)=1.3) and 0.01 (-log10(0.01) = 2) probability level.
The QTL No. corresponds to the QTL No in Table 3 and Table S4.
BLUP values were used in the tests for different populations.
Corrected observations of merged populations were used in the tests for different year/location environments except for several highlighted QTL, including PLH/QTL3 and DTM/QTL7 for which BM population was used, DTM/QTL8 for which EV population was used, and PAL/QTL22, LIO/QTL28 and LIN/QTL31 for which SU population was used. Thoese QTL are more population-specific.
